# Supplementary material
Source: publisher figshare collection journal article supplement (https://gsajournals.figshare.com/ndownloader/files/14190665)
Supplement: Supplementary file 1 [file 14190665]

## Sheet: Sheet1
Table S2. Transformed best linear unbiased predictors for five colorimeter traits in the Ames maize inbred panel.
Line	hue	L*	a*	b*	Chroma
PI186191	3816.45	3302.79	20.478	42.4301	47.962
PI198904	3949.21	3176.43	20.6638	44.4529	49.9686
PI186223	3977.67	2917.46	18.1191	41.6239	46.4198
PI221805	3994.06	3339.25	17.9387	41.8943	46.8901
PI186227	3997.99	3392.64	19.6711	43.3384	48.5016
PI186217	4031.96	3284.45	20.4386	45.0116	50.3769
PI186226	4045.42	3958.59	17.1974	40.1054	44.5949
PI186229	4099.78	3587.3	18.5789	42.7686	47.4743
PI186185	4187.64	3710.61	18.9695	45.8859	50.646
NSL437948	4278.51	4744.65	7.35684	59.6451	66.0204
PI198896	4279.96	3309.01	16.5538	41.202	45.1787
PI198894	4315.02	3337.19	19.5745	46.7112	51.4971
PI198902	4321.32	3530.24	19.301	46.661	51.2464
PI221817	4331.56	3807.72	15.1743	39.3079	42.9047
PI340829	4370.05	3438.42	20.2244	49.4442	54.2023
Ames28291	4408.19	3242.7	16.7416	43.7467	47.6065
PI186188	4428.66	3411.75	19.5038	48.603	53.1411
PI186219	4429.56	3509.64	18.1565	46.6331	50.8565
PI221811	4501.85	3170.51	17.8923	46.2465	50.2443
PI186216	4525.9	3189.17	16.7539	44.4994	48.1637
PI186215	4559.08	4150.43	13.8234	38.8756	41.8815
Ames29000	4596.79	3291.14	18.0553	48.1482	51.9982
PI198906	4601.89	3624.05	15.1701	42.1073	45.3843
Ames27148	4608.77	3134.12	15.0529	42.6958	45.9241
PI270297	4611.73	4167.16	13.3627	39.3481	42.2434
PI654053	4658.39	3710.89	16.3112	46.4451	49.8418
Ames28998	4666.29	3323.11	16.7793	46.0535	49.7305
PI221804	4673.58	3539.68	16.5961	45.8739	49.3498
PI587131	4691.59	3627.11	11.9738	36.6697	39.1546
PI198895	4715.31	3612.29	17.2149	47.4044	50.9425
PI303940	4762.67	4870.98	16.7625	47.9883	51.4532
PI186218	4767.24	3819.59	18.0922	50.2778	53.8849
Ames28999	4809.04	3236.48	16.7848	47.8093	51.1299
Ames29018	4856.3	3589.95	14.3811	43.3059	46.2153
Ames29019	4863.69	3501.08	16.6034	48.9641	52.2576
PI391682	4867.29	3888.08	15.1365	45.8608	48.858
Ames28981	4900.91	3321.77	16.5535	48.5247	51.8202
PI340835	4936.46	NA	4.90408	NA	56.078
PI415085	4976.02	3123.92	14.1338	45.3679	48.0841
PI221820	4979.69	3253.7	14.352	44.8202	47.4932
PI415083	5017.53	3447.86	12.7788	42.3565	44.7461
PI641246	5028.63	3891.21	14.5857	45.9433	48.5013
Ames29017	5045.9	3683.35	14.0547	44.9479	47.5843
PI221813	5061.13	3880.19	13.748	44.5947	47.0477
PI593015	5080.65	3771.84	13.418	45.4281	47.8145
PI635124	5097.85	3277.32	10.7677	40.2476	42.191
PI186224	5106.13	3541.87	12.6548	43.9656	46.368
Ames29021	5110.73	3506.9	15.148	48.4966	51.2742
Ames27123	5119.16	4132.49	11.9886	41.9376	44.0357
Ames30529	5124.96	4619.32	14.4822	48.2344	50.7916
Ames29020	5130.79	3984.36	13.3768	44.4484	46.867
PI583774	5139.27	3591.49	14.5506	47.6423	50.3012
PI198888	5145.02	3965.54	14.0092	46.185	48.5915
Ames24576	5147.26	3411.97	14.1686	46.4924	48.915
PI639041	5151.32	3423.48	16.2485	51.2818	54.0059
Ames27062	5152.2	3647.25	14.4614	48.3432	50.8807
Ames29045	5177.39	3797.93	14.0679	47.9906	50.3555
Ames29001	5179.83	3333.96	14.1325	46.8206	49.226
PI641249	5180.64	3671.64	16.5867	53.5148	56.3723
PI198892	5180.67	3556.44	15.3693	47.0319	50.071
Ames29003	5186.95	3952.93	12.9157	44.1129	46.413
PI303938	5193.03	3302.34	11.6613	42.0173	44.0501
NSL438037	5198.55	3722.9	14.0302	48.5444	50.953
Ames28970	5225.41	3613.64	12.3473	43.7672	45.8846
PI595554	5239.43	3999.83	13.2448	46.8673	49.0308
Ames28170	5240.2	4683.59	14.9123	50.6012	53.1522
PI459082	5244.8	4112.79	13.4515	47.809	50.0421
Ames27098	5253.43	4131.71	15.212	51.4064	53.9241
PI186193	5266.45	3817.11	14.3259	48.7856	51.2404
Ames29004	5280.93	3608.11	14.0226	47.802	50.1819
NSL8582	5283.37	3172.81	10.0756	39.5937	41.265
PI340820	5287.75	3443.7	14.066	46.9745	49.6308
PI198901	5288.99	3999.74	13.675	48.8257	51.1584
PI186221	5296.72	3794.42	15.9336	53.6333	56.233
Ames30943	5314.12	4041.62	12.7976	45.1267	47.1031
Ames30863	5315.29	4138.38	13.3282	47.8096	49.9638
Ames27175	5320.92	3693.41	12.1371	44.1832	46.1341
PI415084	5327.46	3862.97	13.3624	47.9389	50.152
Ames28980	5348.38	3399.35	12.2591	45.4353	47.4949
Ames24577	5356.19	3622.69	12.0987	44.6457	46.5307
Ames12737	5380.63	3341.97	13.4489	48.2506	50.3534
NSL67799	5404.2	3517.19	9.50909	39.0843	40.5572
Ames27261	5405.23	4084.28	12.8194	47.6959	49.6599
Ames28975	5424.86	3802.38	12.7595	46.6994	48.7453
PI542715	5442.83	3707.85	11.847	44.7794	46.5426
Ames28991	5444.73	3665.1	13.6696	49.6066	51.7724
Ames28988	5460.14	3392.61	10.3115	41.182	42.7984
PI415082	5460.62	3770.78	11.9134	46.0456	47.8885
PI186183	5468.62	4074.98	13.7348	50.2068	52.294
Ames29016	5469.06	3725.22	12.7761	47.2861	49.1474
PI601496	5481.13	3635.14	13.8709	51.5755	53.7354
NSL22633	5486.61	4870.52	8.43341	36.987	38.2092
Ames28982	5494.28	3383.53	12.6581	48.1998	50.1052
PI641245	5496.31	3689.71	13.6669	50.3824	52.3355
NSL75979	5497.34	3503.71	13.5861	51.4598	53.4623
PI587145	5498.26	3749.45	13.2167	49.3828	51.3264
PI415081	5500.06	3954.47	11.1382	44.2188	45.8988
PI593009	5510.17	4104.19	16.3699	58.7823	61.1883
PI641232	5513.07	4120.43	11.8217	47.5168	49.2779
Ames29005	5516.85	3540.5	12.1554	46.5693	48.316
Ames26798	5522.59	4319.76	11.0405	44.412	45.9825
PI340865	5532.21	3630.62	11.2518	45.8102	47.5415
Ames29009	5535.38	3727.95	11.9342	46.0816	47.7807
Ames28992	5537.06	3502.21	12.2609	47.0644	48.8959
Ames27208	5542.83	3745.83	12.4525	47.7568	49.4761
NSL437884	5548.01	3929.41	9.75377	41.4711	47.4838
Ames27207	5561.06	3876.4	15.9175	54.9228	57.0961
Ames28997	5561.66	3562.09	12.2532	47.7088	49.5361
PI340878	5564.99	3752.72	14.0872	52.695	54.7146
Ames29002	5566.43	3868.53	13.1992	50.2887	52.2476
NSL75977	5567.66	3997.69	10.7214	43.357	44.8933
PI658072	5567.68	3499.29	12.5927	48.3524	50.0714
PI186230	5573.98	3814.69	13.1958	50.271	52.2202
Ames28984	5582.12	3819.73	12.7948	49.3657	51.2435
PI595568	5586.05	3862.81	13.6375	52.3383	54.2435
Ames27097	5602	4165.32	13.3921	53.1038	55.0045
Ames29014	5605.47	3572.1	11.7516	47.4233	49.0305
Ames19282	5606.1	4073.82	9.5588	41.8774	43.2478
PI608766	5607.14	3651.44	11.2297	42.77	44.7126
Ames27126	5609.59	4466.35	12.1021	49.049	50.723
PI639498	5611.93	3074.78	10.367	44.1992	45.5764
PI542777	5613.2	3736.14	11.6556	46.8554	48.4838
Ames28995	5619.89	3795.86	10.9939	44.8726	46.4562
Ames27174	5622.3	4315.99	11.8428	47.5116	49.1618
Ames24989	5632.22	4246.73	11.9587	48.1212	49.7408
NSL29316	5636.79	3877.64	13.7347	55.6111	57.9697
PI340853	5640.84	3668.72	13.3199	52.3272	54.1836
PI639044	5641.66	3736.09	13.7065	53.5482	55.2715
Ames28985	5646.67	3498.16	11.1086	45.6973	47.283
PI595569	5647.45	4147.61	14.3343	55.4716	57.4373
PI340826	5656.17	3473.53	12.1746	49.394	51.085
PI639046	5662.69	3205.57	10.9405	45.2294	46.6406
Ames28994	5669.76	3592.96	12.5709	50.6412	52.4556
Ames28977	5672.97	3584.51	10.4807	44.1557	45.5293
NSL437952	5688.37	3813.43	12.8886	51.9907	53.7724
PI406120	5691.82	3512.87	9.94022	44.1333	45.4935
Ames10244	5691.98	4074.98	11.1524	47.4489	48.892
Ames19014	5696.28	4139.32	12.7856	51.4186	53.2016
Ames23479	5697.09	3758.95	11.8009	48.9763	50.6436
PI591017	5720.02	4347.66	15.2119	59.7726	61.8294
Ames23439	5722.99	3564.18	11.7966	50.321	51.8631
NSL30063	5723.6	4266.44	12.8016	52.4655	54.2311
Ames28971	5724.65	4073.87	9.03308	40.7704	41.9929
Ames26253	5737.07	4075.91	13.175	54.0449	55.7059
PI587130	5737.34	3732.52	11.1647	47.1613	48.6505
PI595558	5741.25	4031.5	12.5273	52.4033	54.019
Ames12729	5744.9	3627.08	10.1327	44.1773	45.4813
Ames28184	5746.38	4052.9	11.6087	49.7113	51.1697
PI542776	5750.67	3994.94	10.7533	46.0121	47.3508
PI257513	5754.29	3930.09	9.24148	42.4429	43.6714
Ames28990	5758.78	3546.63	9.9425	44.2387	45.5344
Ames29012	5769.58	3707.72	10.9244	46.8161	48.1636
Ames26788	5772.4	3796.98	11.4616	49.4946	50.9743
Ames28972	5777.95	3297.38	10.4963	46.6065	47.9871
Ames30796	5780.74	4466.26	8.0446	49.4453	50.5803
Ames27111	5782.21	3923.46	10.8599	47.5154	48.9232
NSL437943	5784.34	3671.72	12.024	51.3961	52.8677
Ames29394	5785.11	3821.4	12.5858	52.5132	54.1934
PI531083	5786.76	3712.92	10.7981	50.9975	52.4102
PI369446	5786.92	3634.64	9.77316	45.0667	46.3981
Ames27198	5794.49	3936.44	12.3208	51.3424	52.8194
Ames10262	5799.7	4013.62	11.4799	50.1733	51.5707
PI506253	5801.03	4285.19	13.5303	56.1294	57.7641
PI542778	5802.36	3871.36	10.2526	46.5062	47.7844
Ames28989	5808.51	3781.69	11.2595	48.7582	50.2193
Ames21096	5811.09	3909.13	9.78968	45.3695	46.5962
Ames22020	5811.38	3454.56	9.0612	42.4695	43.6218
PI535927	5811.64	3502.75	10.6723	48.1562	49.5836
Ames23447	5819.39	3652.91	10.299	47.3549	48.6422
Ames30940	5831	3535.83	10.9524	48.009	49.2412
NSL437908	5833.07	3586.62	13.0409	54.7494	56.3614
Ames26767	5833.22	3945.23	11.6599	50.777	52.178
PI415087	5833.36	4228.33	9.55039	44.9156	46.0931
CIze38	5835.92	3621.97	10.45	46.6899	47.9506
NSL437893	5837.16	4339.63	11.9187	51.4873	53.0109
Ames18999	5847.56	4122.69	11.4972	51.2211	52.6275
Ames2338	5854.9	4161.22	12.6157	53.8337	55.4588
Ames26604	5855.93	3418.77	11.4916	49.9636	51.3556
Ames27136	5858.2	4108.95	12.5486	53.4539	54.9735
PI257514	5873.65	3658.2	10.1472	47.5199	48.7913
NSL67797	5873.95	3931.77	12.199	52.8962	54.3471
NSL75976	5874.3	3632.72	13.0761	55.1854	56.7462
PI594088	5880.37	3397.36	9.5783	44.4365	45.5314
Ames28993	5882.53	3454.93	11.1135	48.8499	50.1151
Ames29024	5888.26	3573.16	11.4398	50.4697	51.7923
Ames23501	5891.45	4526.65	12.2681	54.8256	56.3659
Ames27108	5891.91	4253.37	8.09819	42.0945	43.0841
Ames29007	5894.48	3686.2	10.5484	47.8286	49.0347
Ames28986	5894.66	3803.48	12.6261	54.3192	55.8771
Ames29010	5895.73	3867.2	11.9557	52.0985	53.5676
Ames27143	5897.01	3304.51	11.4671	51.1172	52.4889
Ames29027	5898.56	3680.15	10.7366	48.4568	49.7237
NSL75971	5899.4	3565.13	13.0169	55.7662	57.3064
PI632413	5900.01	3905.32	13.4966	57.1908	58.7333
Ames28987	5901	3930.02	11.3147	50.1631	51.5411
Ames29006	5908.3	3921.48	10.6172	48.6215	49.9221
Ames27028	5910.35	4540.96	10.8274	50.2633	51.6229
PI391666	5911.7	3932.19	9.38359	45.9456	47.1431
PI658074	5914.38	4607.85	10.6998	48.5652	49.765
PI601558	5927.11	3633.36	11.6891	52.5109	53.9649
PI595553	5927.32	3974.77	11.628	52.4516	53.7434
PI406119	5928.39	4246.48	8.15929	40.5332	41.4722
Ames2331	5934.89	4888.95	11.3197	51.3633	52.6949
PI550546	5937.96	3490.44	10.2823	48.8254	50.0429
PI587134	5940.06	3239.97	8.125	42.0661	43.0896
Ames19290	5943.6	4682.44	10.0654	47.1365	48.2463
PI594045	5955.5	3832.8	11.559	52.1857	53.4724
Ames27188	5962.49	3616.16	11.456	52.018	53.3134
NSL67792	5965.94	4766.96	12.5592	55.6325	56.995
PI593011	5966.36	4197.21	10.2431	48.577	49.7474
NSL67790	5966.95	3642.47	11.6924	52.559	53.8732
PI550918	5977.91	4330.29	9.23766	45.283	46.2906
Ames28976	5980.47	3481.07	9.68131	46.3299	47.4417
Ames2329	5982.6	4217.86	8.98028	43.9718	44.9677
Ames23445	5982.63	3543.38	11.1235	51.3184	52.6321
NSL438032	5984.53	4140.87	10.4472	49.538	50.7154
Ames14114	5984.93	3924.31	9.90506	47.8145	48.9855
PI651545	5987.8	3714.6	11.0613	50.5901	51.748
PI415086	5988.96	4439.35	9.48168	46.6661	47.8033
PI542716	5989.33	3538.99	10.9961	50.8311	52.012
PI340876	5990.54	3559.53	11.6732	53.2336	54.4934
Ames26137	5995.12	4243.15	12.9044	57.3469	58.749
PI186228	5998.56	3627.34	11.2382	51.7926	53.0812
PI559936	6001.43	3852.96	10.3329	48.6982	49.7731
NSL22894	6002.17	4085.69	10.8482	51.9699	53.1763
PI593010	6008.06	3892.99	11.7663	54.6181	55.9117
PI601785	6011.91	4323.36	13.777	60.7028	62.2261
NSL75980	6015.65	4074.3	10.382	50.014	51.1301
Ames29026	6019.28	3767.92	10.719	50.243	51.406
Ames29448	6030.27	4284.74	11.6487	53.6889	54.8241
PI641224	6036.2	4020.89	11.8307	55.5746	56.848
Ames28973	6036.25	3767.9	10.2136	49.2341	50.3736
PI601321	6036.86	3962.66	9.99466	49.6492	50.7295
PI548808	6046.17	4641.54	12.0584	55.5504	56.7105
Ames19283	6047.26	4138.05	9.72976	48.6975	49.8105
Ames27214	6050.03	4132.43	12.1554	56.2109	57.4756
PI595559	6051.55	4326.73	12.3407	57.4624	58.7213
PI639038	6056.33	4059.19	11.6781	54.3812	55.5913
PI594089	6057.99	3566.16	9.18208	46.4821	47.4359
Ames29447	6060.23	5176.83	13.2764	60.12	61.5054
NSL29287	6061.17	3738.76	9.01242	46.6082	47.5997
NSL65868	6063.09	4071.74	11.3444	53.1464	54.3241
PI406107	6064.35	4707.97	11.3265	54.1508	55.3716
PI539930	6079.92	4265.48	11.5655	55.6947	56.9546
Ames24585	6083.56	4739.23	9.32962	47.9252	48.9773
PI644101	6087.13	4055.64	11.0027	52.9927	54.0792
Ames19015	6088.51	3977.03	10.2887	51.1967	52.2895
Ames23446	6089.28	4040.36	9.6602	49.0163	50.0609
PI391672	6091.09	4234.72	10.3531	51.7424	52.8955
Ames29025	6091.87	3558.04	10.8426	52.2529	53.3336
Ames22038	6092.46	3900.67	8.22827	44.4519	45.3855
PI433486	6094.02	4295.18	10.4225	51.6997	52.8063
Ames29008	6096.91	3862.26	9.60949	48.0843	49.1016
Ames22792	6099.44	3860.49	9.90608	49.4596	50.5691
PI641244	6100.29	3714.29	10.4358	51.6525	52.6944
PI550526	6102.83	4045.09	11.967	56.8008	58.043
PI559948	6102.85	3817.02	10.264	49.9782	50.9631
PI547107	6104.93	4320.57	12.2183	57.5708	58.8126
PI651538	6106.38	3561.13	11.3158	54.2467	55.3491
NSL52605	6107.47	3962.09	11.109	52.9844	54.1098
PI406118	6109.65	4492.79	8.21853	43.6038	44.4284
Ames29028	6112.92	3726.5	10.9961	53.1013	54.179
Ames28983	6115.05	3492.87	9.90022	49.5837	50.6293
PI565099	6116.81	4098.87	8.17004	44.254	45.1194
PI587138	6119.46	4024.88	10.5654	52.4372	53.569
PI597926	6121.93	4043.63	10.5025	51.9714	53.007
PI186196	6124.02	3993.61	10.4456	52.0572	53.1173
PI601274	6125.05	3557.25	9.3537	48.6434	49.6
PI584529	6131.93	3961.34	11.4727	54.9067	56.0098
Ames29011	6132.42	3891.8	10.888	53.0104	54.0611
PI547086	6135.35	3843.08	10.2745	51.1762	52.1617
PI221821	6137.57	4459.91	6.31502	52.116	52.6406
Ames30531	6141.08	4268.68	8.75477	46.5217	47.4214
PI658071	6142.34	4601.28	9.87143	50.1888	51.0954
PI221822	6143.85	4624.81	10.3819	52.235	53.2859
NSL437956	6144.7	4063.65	9.47914	49.4603	50.3648
PI642763	6145.39	4113.55	11.9568	57.4584	58.5938
NSL438030	6152.93	4894.13	12.9738	61.1601	62.4388
PI559952	6154.67	4677.47	10.6976	58.3304	59.2413
NSL437987	6159.45	3677.25	9.17823	48.7829	49.7172
Ames12740	6159.55	4080.29	10.181	51.9821	52.9753
PI641068	6161.62	3962.55	10.4977	52.8332	53.8661
PI587132	6162.6	3629.82	10.5613	52.7378	53.7702
PI639499	6165.44	4411.56	12.3051	59.4724	60.5922
Ames26812	6179.45	3912.02	7.15945	42.153	42.8704
PI601275	6181.59	4199.38	11.3941	55.7047	56.7497
Ames30527	6182.44	3881.21	10.2519	51.9125	52.7969
NSL117226	6182.84	4146.25	10.1941	51.6743	52.7522
PI550504	6183.59	3457.15	8.97889	48.518	49.3912
PI221790	6183.61	3826.03	5.75741	37.9494	38.5275
NSL29285	6187.24	3809.66	8.15507	46.0372	46.8613
PI641075	6188.58	4215.44	8.99817	48.3956	49.2387
PI340861	6195.07	3732.79	11.3316	56.1622	57.1917
NSL30911	6195.66	3655.69	8.24034	44.6968	45.4662
Ames27179	6196.04	4223.81	11.4057	57.0058	58.1019
CIze88	6197.41	4654.95	9.05761	49.3278	50.1952
PI600944	6201.02	4672.89	9.48177	50.2151	51.1776
PI559945	6203.89	4026.83	9.4339	49.05	49.886
PI542952	6208.79	3901.82	10.2512	53.1512	54.0969
Ames24719	6214.35	4322.87	11.3255	57.0446	58.1916
PI543008	6214.69	4442.32	11.2938	57.0058	58.0576
PI557557	6215.08	4126.85	9.97504	51.9308	52.8735
PI405712	6216.93	3937.99	9.48404	49.9451	50.8612
PI303933	6217.61	4448.06	9.58804	50.7886	51.7732
Ames30958	6222.07	3754.66	10.0474	51.4725	52.3554
PI572413	6222.17	4044.15	10.3698	53.9334	54.8862
NSL65873	6225.36	3740.89	7.88064	43.8964	44.6086
Ames24730	6227.45	4236.04	10.5486	50.3213	51.5387
Ames24748	6230.06	4181.84	10.2682	53.4533	54.4793
PI550558	6231.14	3621.97	8.79147	50.4477	51.3436
Ames29022	6232.74	3673.51	10.5624	54.0754	55.0516
Ames27171	6235.11	3333.56	7.83194	45.1944	45.8914
PI639111	6236.82	4107.4	10.3131	53.0354	53.9261
NSL29314	6237.58	4660.1	9.58977	50.1919	51.1463
NSL42875	6238.81	4315.65	10.9159	55.662	56.773
PI550464	6239.8	4317.94	9.72872	51.5236	52.4581
PI654051	6241.74	3584.45	9.76116	51.3439	52.1976
PI601566	6241.95	4786.36	11.6045	58.6601	59.7188
PI340843	6242.32	4284.1	10.7911	55.0789	56.0537
Ames10287	6245.4	3774.54	10.0391	52.5907	53.4773
PI639686	6247.52	4469.19	12.6093	54.1927	55.7297
CIze91	6247.64	4774.95	9.97201	52.894	53.7859
Ames30953	6249.37	4831.63	9.84832	52.1479	53.0242
Ames23505	6250.41	4271.65	11.5266	58.933	60.0534
PI639048	6251.59	3623.07	10.6744	55.4379	56.4032
PI601323	6258.33	4007.2	9.30252	50.8387	51.6782
PI641072	6268.59	3872.52	7.70532	44.5448	45.1796
PI595556	6269.33	3984.86	8.99144	49.907	50.7068
PI303937	6270.43	4127.48	8.82608	48.83	49.6297
Ames27048	6275.95	4598.03	6.64535	41.8669	42.5535
PI548798	6278.4	4161.54	10.5332	55.0296	55.9666
Ames29013	6282.1	3871.31	9.25208	50.8298	51.7184
PI587151	6283.55	4067.8	10.0302	53.4967	54.4613
PI587129	6285.28	4085.6	10.6947	55.758	56.7512
PI601332	6287.7	3942.7	9.5233	51.1726	52.0145
Ames12738	6288.33	3765.64	8.45467	47.8141	48.5137
Ames27192	6294.62	4901.74	6.81614	40.6123	41.1806
PI608764	6300.17	4147.3	10.6092	55.8127	56.7051
Ames24716	6302	4205.14	8.39997	48.6717	49.389
NSL28968	6302.28	4325.5	6.6635	41.5757	42.2219
Ames27018	6302.71	4409.79	7.97719	50.4106	51.1972
Ames28934	6308.47	4518.59	9.19557	50.8312	51.65
PI539870	6309.57	4205.86	9.4644	51.4038	52.172
PI639037	6310.72	4179.88	9.23707	50.3248	51.0663
Ames2341	6313.17	4445.19	10.2505	55.1972	56.0892
NSL438042	6316.52	4235.97	8.74265	48.8485	49.5807
NSL438013	6316.76	4108.66	8.51886	49.4128	50.155
NSL438029	6324.38	4146.91	10.5532	56.5633	57.5424
Ames23461	6325.28	3932.14	9.87284	54.4491	55.3639
PI233314	6327.01	3944.76	7.40567	45.38	46.1025
PI550496	6330.51	4165.49	8.70926	49.1611	49.9207
NSL437891	6331.82	4398.17	10.2085	55.5569	56.4473
NSL30869	6333.56	4078.43	10.2797	57.0781	58.0091
PI405714	6335.89	4235.64	8.56455	48.6437	49.5356
PI594061	6340.21	4068.85	6.8781	42.5041	43.0601
PI540749	6341.06	4545.5	10.8966	58.8119	59.7197
PI641071	6342.06	4041.64	8.82144	50.6895	51.4618
PI550440	6345.14	4761.87	8.16245	47.9343	48.6028
PI641074	6350.49	3948.57	9.67495	54.0306	54.8105
PI587149	6352.95	4264	10.0611	55.2525	56.0702
PI583350	6353.4	4307.97	11.5451	60.8587	61.8106
PI601318	6355.25	4266	10.005	54.6517	55.5283
PI659680	6356.02	4404.15	7.38162	44.6974	45.34
PI405713	6356.24	4650.85	8.75174	49.6775	50.41
Ames7870	6357.2	4322.92	9.41192	53.0654	53.8292
PI594090	6358.66	3569.88	7.69641	45.5391	46.1244
PI596356	6359.3	4280.56	9.55536	52.9211	53.7545
Ames23470	6360.15	4046.06	8.42085	48.6407	49.2892
CIze29	6364.44	4806.68	6.96361	44.2077	44.813
NSL437915	6365.88	4642.43	12.3861	64.3601	65.3978
PI550541	6366.2	4452.07	10.2635	56.8727	57.764
PI658082	6369.59	3869.75	9.90022	54.4271	55.1424
PI641073	6371.61	3884.33	7.97643	47.9388	48.5595
NSL30875	6371.97	4251.65	10.5025	57.1851	58.0482
PI559940	6372.35	4253.85	9.2457	52.6902	53.4532
Ames10274	6373.84	3456.34	8.87752	50.4344	51.1626
PI601273	6373.86	4026.13	10.559	57.3002	58.1114
PI641226	6375.64	4260.48	10.1858	56.5845	57.4306
NSL30835	6375.75	4649.49	9.25877	54.011	54.8141
PI524970	6377.01	4516.35	10.0376	55.3095	56.1842
NSL30896	6378.61	4179.26	10.2211	55.9383	56.8169
PI608778	6379.66	4140.32	9.7515	55.4273	56.222
Ames30936	6385.8	3465	9.14105	51.5685	52.2433
PI303930	6386.17	4069.12	10.3261	57.6048	58.4285
Ames27197	6387.3	4032.09	10.4759	57.8988	58.7193
Ames23456	6387.75	4406.52	8.70945	50.6678	51.4263
NSL30910	6388.01	3725.49	9.26153	52.7281	53.4368
Ames27218	6389.91	4178.95	10.3909	57.0925	57.8979
Ames27173	6392.77	4607.79	8.34447	50.1346	50.8261
Ames28979	6392.93	4091.94	10.4655	57.341	58.2206
Ames12731	6395.69	3830.34	10.0121	55.443	56.2166
Ames14115	6396.47	3545.4	9.1193	51.7674	52.4577
PI601565	6397.04	4322.24	10.3797	57.4769	58.3586
NSL68252	6400.1	3897.51	9.47608	53.8109	54.5657
PI642764	6403.19	3778.79	9.3318	53.0859	53.8354
NSL30904	6406.26	3615.51	8.79618	51.0196	51.7402
Ames19007	6406.49	4023.17	9.34251	53.6476	54.4045
Ames23409	6408	3803.64	8.34577	49.4529	50.1344
NSL437896	6408.33	4410.05	8.95727	52.2072	52.9022
PI539920	6409.9	3958.45	10.0628	57.115	57.9862
Ames26501	6410.1	4191.85	10.1679	56.4733	57.2337
Ames19318	6411.07	4347.74	9.88249	55.583	56.3867
PI600956	6413.93	4258.93	9.34071	53.4819	54.1796
PI600958	6415.24	4416.17	9.15611	53.0562	53.8387
PI303932	6415.99	4573.61	10.3747	57.593	58.4541
NSL67798	6418.16	4612.55	10.3156	57.9046	58.6878
Ames12726	6421.8	3775.08	8.74729	51.1438	51.8088
PI654048	6422.8	3478.56	9.5049	54.1198	54.865
Ames27176	6423.44	4088.2	9.79711	56.0865	56.8247
PI546494	6430.49	4089.63	9.41042	54.833	55.5946
PI527699	6433.91	4068.09	9.00811	52.8695	53.528
Ames31250	6437.19	4381.81	10.8245	59.8483	60.6259
PI573098	6437.29	4371.29	9.22828	53.697	54.4024
PI639039	6438.81	4357.07	11.4469	62.632	63.5026
CIze85	6439.42	4878.06	10.3236	62.6301	63.3764
PI601272	6441.94	3828.59	7.83096	48.0952	48.632
Ames24589	6442.29	4154.1	10.2848	58.2552	59.0588
PI267166	6443.46	4180.21	10.3874	58.7406	59.583
NSL32731	6444.59	4262.1	8.95557	53.7664	54.5246
PI601469	6445.24	4785.32	7.93106	48.8087	49.4288
Ames31233	6445.56	4124.34	8.78169	51.7075	53.313
Ames19017	6447.28	4674.27	8.64377	51.9322	52.6114
Ames24738	6449.24	4320.37	8.45289	51.662	52.3379
PI641259	6451.68	4289.51	6.6168	43.7963	44.2922
PI601416	6452.74	4107.65	8.74848	52.6397	53.3482
PI601725	6453.41	4516.48	11.0992	61.8651	62.681
NSL438009	6454.33	4182.53	9.31656	54.6487	55.3659
Ames26796	6457.66	4220.47	8.66731	52.0822	52.6787
PI583847	6458.41	4566.79	11.1579	61.8474	62.6587
PI600981	6458.43	4282.1	9.49332	55.379	56.0879
PI601584	6462.23	4333.69	9.97231	57.1717	57.9529
Ames26117	6465.83	4601.47	8.21286	50.4841	51.051
Ames19288	6467.24	5259.42	10.4501	59.0466	59.8686
PI550489	6467.27	4140.27	9.04988	53.961	54.6579
PI587150	6467.43	3688.47	9.09337	53.2868	54.0249
Ames23414	6467.77	4207.68	7.34564	47.4859	48.0541
PI601689	6468.15	4729.56	8.36202	50.6155	51.2213
Ames30944	6468.47	4127.19	10.1007	57.9269	58.651
PI535912	6469.65	3784.66	9.51184	56.1898	56.9338
NSL28966	6470.28	4360.58	9.92254	57.8029	58.609
Ames30969	6470.47	4041.78	8.91855	52.6608	53.2879
PI535906	6470.62	4449.93	8.80846	52.9877	53.7041
PI643420	6471.23	4149.9	8.02697	49.6338	50.2561
PI531510	6471.83	4938.19	12.8188	69.3409	70.3165
Ames20120	6472.25	5132.49	8.43811	51.6152	52.2593
Ames24708	6472.9	3969.17	8.52518	52.7971	53.5012
Ames23924	6474.22	4693.73	10.1052	58.5045	59.2339
Ames19324	6474.34	4109.47	9.61023	55.9377	56.6454
Ames19006	6474.44	3962.15	9.0457	53.4627	54.0901
PI550547	6477.86	3932.17	8.82373	53.3337	53.9527
Ames27212	6479.24	3956.13	9.21663	54.3767	55.0357
PI601498	6480.48	4166.33	8.57747	51.6012	52.2242
Ames24752	6480.55	4332.14	8.4021	51.5083	52.1479
Ames28425	6480.73	3785.74	8.74554	52.1326	52.7558
PI558517	6481.86	4576.72	10.4527	59.513	60.2781
Ames12821	6482.55	4492.89	8.63383	52.2668	52.9143
PI533659	6485.34	4608.13	8.18022	50.4461	51.0929
PI594054	6485.79	4126.89	7.6253	47.8493	48.395
PI517971	6486.04	4238.06	8.64535	52.001	52.639
Ames28416	6487.25	4306.39	8.85359	53.7246	54.3832
PI340862	6490.81	3951.14	9.63606	56.3633	57.0885
Ames23410	6491.06	4017.17	8.47102	51.6351	52.2658
PI550497	6491.27	4382.25	8.94856	53.9431	54.5982
PI601561	6492.83	4286.26	9.65225	56.0723	56.732
CIze81	6492.9	4333.03	8.5737	52.8546	53.4835
PI537100	6493.29	4104.34	9.33732	55.2746	55.9052
PI639043	6494.3	5079.26	11.5509	65.0804	65.8793
Ames12739	6495.08	4321.95	9.51804	56.8266	57.5106
PI634207	6499.85	4185.69	7.32271	47.0984	47.611
PI558522	6500.31	4015.89	8.32998	51.0958	51.6677
PI459078	6501.06	3976.65	7.75153	48.7095	49.2441
NSL32718	6501.13	4593.01	8.91038	54.4724	55.2007
PI659678	6504.2	4484.6	8.625	52.6371	53.271
NSL32729	6507.78	4697.68	9.04182	56.054	56.7095
NSL81597	6510.79	3856	8.01617	50.474	51.0951
PI553056	6512.44	3823.74	7.55364	44.9962	45.714
Ames19311	6515.68	4701.21	8.58618	53.0607	53.6742
PI658084	6515.91	4145.92	8.88028	52.561	52.9598
PI542942	6519.3	3746.52	9.18583	55.0535	55.703
PI522252	6520.53	4363.66	8.58431	53.5367	54.1419
NSL438031	6521.04	4556.58	9.54896	56.8378	57.5046
PI550490	6521.11	4150.09	8.91088	54.714	55.3645
PI369437	6521.49	4408.41	9.49966	57.2481	57.9485
PI641070	6522.79	3736.92	7.97322	49.8261	50.3369
PI550518	6523.81	4205.99	9.22838	55.7308	56.3705
Ames26511	6524.46	4050.65	9.26329	55.3249	55.9608
Ames27168	6527.84	3726.27	9.3047	55.9362	56.5767
NSL437878	6530.74	4747.12	9.01938	55.7731	56.3842
Ames14113	6536.9	4412.5	9.10246	55.3435	55.9689
NSL438007	6537.28	3772.06	8.72525	54.0752	54.6955
Ames28411	6537.91	4005.05	8.81074	53.7547	54.3425
PI639054	6538.05	4295.03	9.49741	56.8598	57.4898
PI221794	6538.98	4332.39	6.48236	45.4376	45.8848
NSL438019	6539.09	4082.11	9.48014	56.701	57.3794
CIze83	6539.45	5143.02	8.86591	55.2626	55.8687
Ames24737	6541.74	4529.17	8.77625	54.0391	54.6584
Ames28978	6542.37	4028.44	7.4555	48.4212	48.9241
PI543849	6544.61	4412.87	7.70163	51.4104	51.9132
CIze82	6544.84	4561.79	8.51488	53.1014	53.6624
Ames19011	6544.84	4541.7	6.66304	45.5911	46.0745
PI506255	6546.08	4518.28	10.1241	60.6106	61.3099
PI406110	6546.26	4208.06	6.64881	46.7834	47.2848
Ames30856	6550.97	3741.57	6.9683	46.8005	47.3162
Ames24575	6552.01	3604.81	8.27285	51.5768	52.0753
PI257507	6553.99	4583.69	6.66283	45.325	45.7855
Ames23450	6555.46	4551.39	10.0626	59.7626	60.4852
NSL437959	6555.73	4109.09	9.21527	57.0678	57.7122
Ames30870	6555.75	4859.88	10.8787	63.9786	64.5904
Ames2330	6557.39	3627.97	7.87016	51.1735	51.738
PI587147	6558.58	4410.27	9.92902	59.4982	60.1657
PI550463	6558.69	4616.53	9.69373	59.0052	59.6106
NSL437998	6559.35	4468.62	7.66395	50.1338	50.5933
NSL68211	6560.71	4783.39	8.38043	52.211	52.7198
Ames20140	6561.05	3904.99	8.69215	55.4198	56.0501
PI186182	6564.02	3965.97	8.98996	55.9393	56.5564
Ames24723	6564.81	4022.83	8.73993	54.5985	55.1991
PI550443	6567.3	4279.11	7.89104	51.15	51.6213
Ames26783	6568.2	4590.47	10.8059	64.4249	65.105
PI221788	6568.99	4099.97	8.49161	53.8946	54.4864
Ames19284	6569.29	4536.72	7.30867	48.037	48.4577
Ames24727	6570.49	4341.2	8.54156	53.8226	54.3953
PI593007	6576.36	4719.51	8.37696	53.8285	54.4044
NSL437890	6577.64	3913.94	9.10865	56.7314	57.3291
NSL30908	6577.69	4114.32	8.32553	54.098	54.6513
Ames23405	6577.94	5093.19	10.103	60.9798	61.6869
PI517973	6578.91	4663.13	10.8413	63.8428	64.573
PI658077	6579.05	4368.85	8.27065	52.377	52.862
PI550472	6579.65	4644.81	9.18653	57.0365	57.6019
Ames24718	6583.47	4630.68	10.025	59.994	60.5801
NSL437960	6583.93	3673.57	8.79736	55.4732	56.057
Ames23406	6584.54	4078.11	7.48127	50.6695	51.1872
Ames27167	6585.73	3654.52	8.5987	54.2254	54.7741
Ames23484	6585.8	4252.71	8.41401	54.3039	54.8877
PI601316	6589.97	4028.58	9.20559	57.8932	58.5322
PI559382	6590.43	4528.5	8.67231	55.0751	55.5923
PI651532	6594.85	4884.38	8.6673	54.8445	55.3598
Ames23467	6598.45	4653.26	8.29838	54.6024	55.1647
Ames30947	6599.41	4542.1	8.02173	53.552	54.0295
NSL75970	6601.03	3911.6	8.85413	55.5638	56.112
PI369439	6601.36	4797.04	6.90925	48.1451	48.5799
Ames26803	6601.46	4445.21	8.43315	54.048	54.5992
PI543846	6601.94	3976.27	8.31516	53.0717	53.5583
PI527700	6602.16	4172.33	8.66854	55.0589	55.5635
NSL438036	6604.27	4835.22	10.0184	61.1986	61.7999
NSL437907	6607.28	4417.07	7.95495	53.272	53.8118
PI511318	6611.72	4466.8	9.38561	58.831	59.4313
Ames24729	6614.02	4493.5	8.23212	54.3246	54.858
PI639504	6615.07	3957.26	8.50941	56.7745	57.2608
PI601778	6615.39	4565.76	9.26367	58.547	59.1653
PI601489	6615.83	4930.23	10.3195	62.8864	63.4998
PI601269	6617.39	4497.14	6.80657	47.6433	48.1256
PI608774	6622.42	4542.15	8.82602	55.5977	56.0909
PI594087	6622.67	3648.98	7.11442	48.5025	48.9177
NSL53094	6623.72	4194.66	8.97503	57.5733	58.1017
PI221773	6623.83	4613.42	6.7192	46.4785	46.8495
PI433487	6623.92	4314.32	5.51651	42.3847	42.8012
PI601611	6624.79	4868.05	10.2047	63.3175	64.0097
PI583351	6625.02	4070.09	7.69356	51.4585	51.9449
PI369442	6629.1	4262.29	7.48008	51.5925	52.071
NSL438023	6630.75	3977.48	8.24418	54.5638	55.0825
PI531084	6630.93	3863.68	8.48476	55.1011	55.6135
PI639049	6635.77	4438.24	8.92478	56.7933	57.2945
PI651537	6637.68	4780.55	9.20892	58.4937	59.0315
PI560082	6638.29	3855.91	8.12374	53.3497	53.8237
PI587137	6638.46	3876.35	5.75481	43.7901	44.1411
NSL438008	6639.38	3788.34	7.2982	50.5479	50.98
Ames10269	6640.93	4411.28	9.23988	59.199	59.7353
Ames23459	6643.39	4526.64	8.0177	54.3751	54.8577
PI559951	6644.55	4193.48	8.55541	55.4956	56.0184
NSL438041	6646.29	4230.32	8.42853	56.3274	56.824
Ames23460	6646.61	3659.32	7.04576	49.3112	49.7726
PI584528	6646.78	4298.58	7.20944	49.8682	50.2599
PI601006	6648.11	4189.3	9.17807	59.085	59.6798
PI639501	6651.26	4023.64	8.90962	57.6091	58.1632
Ames23480	6652.56	4300.9	8.52526	55.5001	56.0245
NSL29282	6652.87	4240.45	7.85574	52.4716	52.9192
Ames26756	6653.4	4546.28	10.2888	63.5071	64.0506
Ames26120	6653.89	4707.28	7.81408	51.8517	52.2797
Ames10267	6654.93	4446.61	7.9844	52.8398	53.3134
PI594075	6655.04	3796.49	7.62876	51.5361	51.9304
PI405705	6655.25	4311.17	9.73633	61.7109	62.3481
PI550467	6655.42	4336.42	8.98546	57.2405	57.7335
PI639047	6656.98	4658.35	9.65396	61.4741	62.0126
PI550491	6660.34	4685.07	7.2892	50.6348	51.0672
PI601007	6660.44	4281.62	8.99162	58.0009	58.5609
Ames25372	6662.43	4262.96	9.25655	59.3607	59.9035
Ames28361	6663.11	4233.38	10.2172	63.2833	63.9204
PI601467	6665.3	4561.37	7.86321	53.3506	53.8349
Ames27149	6666.24	4900.37	8.93396	58.5981	59.1977
PI601374	6667.2	4716.55	10.4833	66.1855	66.8542
CIze7	6667.4	4415.19	7.77207	53.0093	53.4136
NSL30863	6667.62	4628.95	7.26394	50.0943	50.4613
Ames30957	6667.92	4445.97	8.98656	57.8098	58.3432
NSL43597	6668.03	4788.5	10.7717	67.2594	67.8825
Ames23500	6668.73	4012.68	7.33253	51.0035	51.4584
PI405711	6669.87	4625.57	8.30393	56.8483	57.4329
PI559920	6670.31	4466.35	8.60063	56.3679	56.8745
Ames30866	6670.46	3938.56	7.945	52.8544	53.2763
NSL30867	6670.93	4035.31	8.86665	57.7962	58.2711
PI561565	6671.07	4052.5	7.30713	50.3819	50.7826
PI303944	6672.23	4621.2	9.06068	58.9553	59.4457
Ames23431	6673.82	4296.28	7.62092	53.2205	53.7033
NSL437979	6673.84	4225.19	8.69224	56.7959	57.2746
Ames27199	6674.53	4601	9.37461	60.1321	60.6335
NSL30888	6674.75	4265.65	6.8712	50.1283	50.4493
PI540750	6676.24	4516.73	9.25154	59.685	60.1563
Ames27147	6677.82	4077.61	7.31608	51.1512	51.5967
PI555659	6677.95	4405.04	8.84764	57.7541	58.2699
PI511315	6678.75	4183.9	7.64029	53.7543	54.1904
Ames26126	6683.04	4092.78	7.00166	49.1685	49.5377
PI547089	6683.44	3967.51	7.74986	52.278	52.6698
Ames27029	6692.64	4501.31	8.12589	55.2223	55.7355
PI601439	6693.68	4144.35	8.28916	55.5625	56.0027
Ames22751	6694.25	4832.58	9.27545	60.0218	60.4804
PI198889	6695.4	3850.2	8.34468	55.4559	55.9132
Ames24724	6697.89	3894.04	7.57528	53.3262	53.7825
PI641242	6698.18	4574.67	8.59762	57.5287	57.9757
PI583352	6698.25	5259.64	10.4225	66.4536	67.0979
PI601572	6698.25	4390.15	7.48585	52.0076	52.4117
PI535913	6698.86	4338.43	8.41066	56.5062	57.0266
PI303939	6698.99	4678.36	7.90653	53.6764	54.1516
NSL29305	6699.91	5050.18	9.55587	61.7306	62.3043
Ames26758	6701.82	4809.99	10.9483	67.6544	68.313
PI550483	6701.86	4518.82	6.94368	51.6609	52.083
Ames19010	6702.14	4243.72	8.54393	57.3625	57.8062
Ames27043	6702.99	4280.74	7.82709	54.3586	54.8108
Ames14211	6703.12	4394.12	8.57816	58.2102	58.7374
Ames27210	6703.57	3982.43	7.44164	51.5523	51.9661
Ames26743	6706.09	4494.14	9.2841	66.3989	66.7706
Ames31248	6707.91	4476.73	8.72854	57.7879	58.2222
NSL437976	6708.38	3801.14	7.90113	53.8233	54.2042
PI267168	6709.09	4351.73	7.8404	61.2665	61.6248
Ames22034	6711.31	4018.72	6.70798	49.5782	50.0115
PI415079	6711.31	4839.05	7.05063	51.1077	51.5574
Ames23498	6712.56	4662.96	8.25743	56.4729	56.9458
PI606330	6713.74	4716.13	9.7106	63.1879	63.6869
Ames28954	6718.11	4417.27	6.62801	49.553	49.8526
Ames28426	6718.59	4404.21	7.82313	54.2446	54.6153
PI587143	6721.49	4160.64	7.44752	53.5028	54.0011
PI601005	6723.79	4392.31	8.80918	60.68	61.2151
Ames28418	6724.1	4201.91	9.12157	61.291	61.7795
PI633924	6724.1	4456.57	8.48133	57.1689	57.6115
Ames28413	6725.3	4707.1	8.34114	57.338	57.8005
PI641243	6725.64	5162.82	6.2887	47.0061	47.3125
Ames10264	6727.22	3955.19	7.12299	51.3722	51.7085
Ames27141	6730.86	4718.69	8.68293	58.5101	58.9481
PI369443	6731.46	3914.2	8.44551	57.8156	58.2909
PI550530	6733.84	4203.05	7.59364	54.5093	54.9824
PI559942	6734.73	4512.11	9.47679	63.1945	63.6799
Ames23401	6735.76	4163.58	7.93058	56.1862	56.6582
PI607524	6735.78	4375.64	7.55111	53.6253	54.0145
PI550565	6738.34	4332.76	8.68513	58.5559	59.0259
Ames25221	6738.34	5378.76	9.71943	63.4067	63.9686
PI531081	6739.61	4106.67	6.61739	49.1654	49.5036
PI639685	6739.74	4806.29	8.42819	58.1046	58.5744
NSL437962	6739.93	4496.7	8.57548	58.4237	58.8397
Ames30795	6740.48	4087.06	7.65159	53.773	54.1434
CIze317	6740.54	4357.47	5.21609	43.8364	44.1023
PI564697	6742.4	4527.59	8.79639	59.9532	60.3673
PI303928	6742.42	4082.25	7.84682	54.5557	54.912
PI601190	6743.71	4326.95	8.60501	58.4835	58.9814
PI555651	6745.03	4381.76	5.50733	44.3097	44.6238
PI550466	6745.58	4274.75	8.10978	55.7677	56.1669
Ames26124	6746.17	4403.95	8.08267	57.9297	58.3394
Ames24705	6746.97	4941.93	8.11809	56.1098	56.4783
PI601331	6746.97	4143.14	6.94182	50.6648	50.9517
Ames30864	6748.03	4220.06	9.24563	62.4407	62.8682
PI594073	6749.27	4645.88	7.15552	52.0482	52.3723
PI540751	6750.51	4320.29	8.13956	56.5542	56.9408
PI406124	6751.48	4376.75	8.45981	58.3855	58.7829
NSL437879	6751.86	4480.38	7.17043	52.0294	52.3445
Ames23413	6752.73	4585.47	7.96172	55.7979	56.1507
PI639505	6753.4	4956.79	9.56513	64.3902	64.8547
PI608777	6753.56	4792.9	7.80997	55.0567	55.4468
PI639938	6753.65	3559.8	8.01077	56.3732	56.7456
Ames27017	6753.77	4203.43	7.54878	54.0034	54.4423
NSL30062	6754.1	4329.76	7.18857	52.0935	52.4691
Ames2328	6754.48	4160.13	6.43058	48.4096	48.7447
NSL65874	6755.86	3985.8	7.72324	55.186	55.5863
Ames27066	6755.99	3958.5	7.00823	52.2951	52.6389
PI587139	6756.5	5638.03	9.65536	64.7435	65.2967
Ames10272	6757.24	4923.5	8.92744	61.5359	61.9848
PI559941	6757.5	4516.73	8.5903	58.7664	59.1651
NSL437973	6758.25	4583.86	8.50399	59.2698	59.7074
NSL22984	6763.07	4624.3	6.57095	49.4707	49.8221
PI601403	6764.27	4646.39	7.87639	56.2968	56.6826
PI550553	6764.59	4344.2	7.79013	55.8874	56.3345
PI343953	6766.01	4259.85	8.26108	59.1805	59.6385
PI594056	6766.75	4182.2	7.14047	51.8103	52.2038
PI659681	6767.49	5130.84	8.57371	59.5985	60.0367
NSL438021	6767.58	4515.81	8.20568	58.3268	58.6928
PI648424	6767.97	4490.91	6.93804	51.2959	51.6111
PI561694	6769.53	4930.41	8.71666	59.8582	60.3285
PI186199	6774.38	5037.99	8.12982	57.1976	57.5526
Ames12725	6775.15	5133.12	7.38794	54.1925	54.5421
Ames30910	6776.21	4291.81	6.16653	46.5448	46.7873
NSL438043	6777.08	4502.38	9.11817	62.3579	62.7879
Ames30975	6777.62	4372.57	8.01388	56.4666	56.8258
NSL438010	6777.98	4384.39	7.75727	55.5497	55.9168
PI557556	6778.2	3981.02	7.86487	56.0227	56.4125
NSL437877	6778.51	5321.9	8.06118	57.1846	57.5407
PI559954	6778.9	4732.03	7.20275	51.8907	52.1876
NSL197104	6779.46	4826.17	8.0147	57.0817	57.4682
Ames23458	6779.7	5397.78	9.88989	66.0176	66.5571
PI433485	6782.17	4037.85	7.19007	53.1823	53.5201
PI601490	6783.5	4154.42	8.01844	56.8171	57.1934
PI639056	6785.44	4433.92	8.43137	58.8107	59.1762
NSL30909	6787.15	5090.45	9.18824	62.575	62.9527
PI594052	6787.35	4223.92	6.55325	49.6547	49.9395
PI600791	6787.4	5493.97	9.93992	66.4129	66.9366
Ames27104	6790.05	4063.77	6.59137	50.3927	50.716
Ames27026	6790.59	5180.72	7.38645	54.0552	54.4626
Ames31237	6791.21	4244.64	8.02666	57.0889	57.4884
PI631444	6792.68	4417.69	6.91062	52.2854	52.6341
PI415089	6794.48	4416.27	6.38314	50.4212	50.7429
NSL437971	6794.79	4081.12	7.46957	54.1168	54.4454
Ames28362	6795.96	4807.37	9.40138	64.8148	65.2438
Ames30954	6799.05	4554.86	7.27198	52.8027	53.133
PI555650	6799.89	4198.49	7.98198	56.3918	56.7729
PI546484	6800.37	4567.39	8.47466	59.812	60.2174
NSL438038	6801.1	4792.14	8.75558	61.6489	62.0404
PI542945	6801.11	4451.8	8.84	61.9966	62.4004
Ames28938	6801.45	4595.01	7.43072	54.5446	54.8521
PI639051	6802.3	4136.35	7.78264	56.1661	56.5349
Ames31247	6803.03	4568.21	9.2428	63.7945	64.195
Ames30793	6803.16	4730.28	8.18738	59.0842	59.4783
PI558516	6803.29	4468.29	6.45226	51.0082	51.3307
NSL437980	6805.23	4898.39	8.81136	51.1635	52.1053
PI601271	6805.68	4059.63	7.51969	56.4317	56.783
PI651533	6806.5	4412.66	7.90673	57.0031	57.3346
Ames24732	6808.61	4418	8.09973	58.6078	59.0274
PI601404	6809.18	4628.39	8.81661	61.4033	61.8057
PI548805	6810.36	4114.43	6.83446	51.4473	51.7189
Ames27032	6811.7	4498.82	6.32647	50.5099	50.8931
PI593017	6812.78	4193.45	6.77336	51.1948	51.5016
Ames28936	6813.18	4521.35	8.56182	60.8604	61.2266
Ames23448	6814.78	4504.55	8.16151	59.2508	59.6652
NSL30912	6818.25	4733.59	6.11945	48.7272	49.0373
PI593014	6818.29	5179.48	9.69278	65.9237	66.3926
PI200194	6821.96	4352.18	5.04424	43.567	43.7869
PI601276	6822.32	4289.07	5.76917	46.196	46.3917
PI517972	6823.44	4541.04	7.61794	56.6537	56.971
PI221775	6826.41	5244.47	7.37526	54.4006	54.7081
PI601458	6827.36	4717.29	8.00792	57.4636	57.8192
NSL30891	6827.88	4522.88	6.29941	50.4128	50.6499
PI369438	6829.7	4501.57	7.18372	54.9586	55.2914
Ames26799	6831.45	5166.59	8.0455	59.4637	59.7819
Ames30968	6831.75	4542.89	6.93982	52.823	53.1518
NSL22983	6833.62	4247.51	6.42552	49.8602	50.1078
PI559939	6833.77	4266.66	7.2478	53.852	54.1228
Ames26136	6834.14	4823.01	5.95576	48.193	48.4455
Ames27064	6834.19	3938.99	8.05239	58.7593	59.1246
Ames26755	6835.02	5004.75	9.72934	66.8999	67.2999
NSL81598	6838.71	4424.2	8.61381	61.2862	61.6258
Ames25559	6840.64	4505.92	7.02008	53.4129	53.6963
PI601790	6840.65	3928.48	6.0641	49.1427	49.4293
Ames24721	6840.76	4959.88	8.5148	60.5394	60.9379
PI560317	6841.42	3703.26	7.49424	55.8023	56.1408
PI594050	6843.59	4474.88	7.86593	57.7548	58.1461
Ames26135	6844.11	4285.85	6.95153	53.3622	53.6882
PI391414	6845.39	4690.41	8.71879	62.0647	62.4792
Ames24706	6846.32	4134.7	7.07887	54.1546	54.4899
Ames26439	6846.4	4626.57	7.82394	57.4717	57.7921
PI639937	6846.77	4425.05	7.97102	58.9399	59.3298
PI186192	6848.74	4272.42	8.20622	59.858	60.2342
PI520772	6848.74	4518.15	8.07648	58.6667	59.0139
PI606768	6848.74	4477.11	8.38598	60.3664	60.7402
PI601724	6851.33	4494.71	8.4729	61.6267	62.0248
PI594057	6851.39	4092.33	6.48335	51.1895	51.39
Ames30934	6852.84	4620.41	9.13673	65.1632	65.5235
Ames26114	6854.64	4667.88	8.17564	60.7215	61.0363
NSL32738	6854.7	4536.29	7.61903	56.9953	57.3421
Ames26775	6854.93	4455.02	7.44342	55.8438	56.1583
Ames27183	6854.93	5421.93	9.45569	66.5681	67.0179
Ames30869	6858.52	4456.34	7.58587	56.4844	56.7531
NSL32730	6859.62	3982.08	7.07793	54.8963	55.1986
Ames27184	6860.8	5421.98	8.5169	61.7262	62.0382
NSL437990	6861.98	5305.93	7.01474	53.4515	53.7214
PI565112	6862.13	4016.11	6.53655	50.8931	51.1209
Ames27216	6863.42	4721.69	8.93974	64.2232	64.5789
Ames30951	6864.19	3930.63	7.34501	55.4926	55.7915
Ames23430	6866.35	4366.11	8.11413	60.1181	60.4183
Ames27050	6867.86	4353.46	6.11255	49.8324	50.0939
Ames24741	6868.88	3928.35	7.35302	55.983	56.3347
Ames30967	6870.65	4731.68	8.12083	59.7352	60.0361
Ames19019	6871.38	4576.29	8.47829	62.4105	62.7166
Ames24709	6872.4	4386.72	6.93876	53.6233	53.932
Ames30945	6872.97	4471.75	6.65337	53.3037	53.542
NSL81595	6873	4687.82	7.46793	55.9916	56.2849
PI601560	6876.87	4989.18	8.66185	62.8184	63.195
PI548788	6878.06	4312.69	6.55922	52.4081	52.6534
Ames27200	6881.68	4385.12	7.31456	55.9859	56.2509
PI550554	6881.68	4725.53	6.25763	51.4905	51.7601
NSL437897	6883.04	4348.35	6.99081	54.9514	55.192
NSL32739	6883.42	4307.36	7.76707	58.3968	58.7518
PI560081	6885.59	4766.99	7.09817	55.192	55.4414
Ames27041	6886.34	4484.36	6.62643	52.9798	53.2949
PI601745	6886.52	4665.52	7.5792	58.604	58.9096
PI550534	6887.17	4864.29	6.5833	52.6413	52.8742
PI538008	6888.91	4347.42	7.71478	58.3967	58.7071
Ames23494	6889.47	4692.49	8.47762	62.6603	62.9633
Ames12735	6890.28	4228.28	6.40278	51.6525	51.8449
NSL438005	6890.28	4828.87	8.69805	65.352	65.9069
PI550522	6890.63	4652.49	6.74485	54.2185	54.5188
PI658090	6894.94	4249.83	7.32596	56.4991	56.7675
Ames28948	6895.4	4485.31	7.82264	59.0078	59.2789
Ames27189	6896.63	4212.3	6.81263	53.9134	54.128
PI517974	6898.67	4401.99	7.39952	57.3595	57.6302
Ames25374	6898.93	4455.12	7.89145	59.8714	60.1691
Ames30868	6899.6	4461.09	8.0848	60.2459	60.5388
Ames24726	6902.22	4351.69	6.94517	54.4212	54.6707
Ames28949	6902.69	4781.44	5.97213	49.4006	49.6101
PI601438	6902.78	4726.81	7.61381	58.0821	58.3243
Ames28414	6904.19	4427.79	7.65034	58.5313	58.7937
PI547087	6906.33	4253.29	7.46814	57.2973	57.5408
PI601320	6906.62	4518.2	7.88503	59.6253	59.8907
Ames27112	6906.81	4393.96	5.94875	48.9947	49.1413
PI559375	6908.33	3793.22	6.58985	52.507	52.774
Ames30948	6909.05	4445.71	7.46457	56.6669	56.905
PI639936	6911.5	4198.44	5.74867	49.0601	49.1995
PI533658	6912.18	4676.21	7.71177	59.1257	59.4199
PI587154	6912.82	4346.67	8.20753	61.3954	61.6732
PI601324	6915.76	4153.91	7.9891	61.1181	61.4042
PI459080	6920.28	4357.89	5.6861	48.1552	48.2764
PI566938	6921.46	5115.17	7.34659	57.0583	57.3378
PI639941	6922.12	4560.99	6.97338	55.4495	55.6479
NSL68249	6922.52	4158.54	7.33719	57.264	57.4859
Ames24740	6923.28	4292.74	6.93576	55.0184	55.2427
Ames23922	6923.87	4446.21	6.44842	53.1052	53.3483
PI592735	6925.09	4756.98	6.97224	55.4056	55.6551
Ames12824	6925.98	4494.96	6.73953	54.586	54.7735
Ames27106	6927.11	4656.37	7.61593	59.5035	59.8046
PI548799	6927.3	4683.16	8.8582	65.8929	66.2054
Ames27153	6927.34	3873.16	6.88065	54.8717	55.0672
Ames12733	6927.55	4737.05	7.03103	55.9007	56.128
Ames23463	6927.86	4277.43	6.54121	53.6785	53.8876
Ames15929	6928.07	4446.86	5.94885	49.9008	50.0646
Ames28415	6930.02	4612.93	7.96382	60.9319	61.2137
PI594051	6930.54	4285.65	6.95814	56.3323	56.5807
PI601728	6931	4996.83	7.8825	61.1869	61.5137
NSL437946	6931.05	4296.36	7.91422	61.0102	61.285
PI639502	6932.11	4374.16	7.26624	58.0473	58.3033
PI559384	6933.14	4187.35	7.61798	59.0048	59.286
PI427111	6934.09	4728.06	8.42737	63.7939	64.147
Ames25219	6934.6	5427.19	8.66835	64.2787	64.6143
NSL29898	6935.64	4067.85	6.65032	53.9504	54.1629
PI608765	6937.39	4772.63	7.59711	59.3976	59.6223
Ames26754	6937.91	4442.43	6.12372	51.46	51.5964
PI601658	6938.01	4383.83	6.7266	54.5145	54.7683
Ames27206	6938.99	4907.84	7.79037	60.606	60.8856
PI553059	6939.75	4896.64	6.38674	52.3942	52.5657
PI565111	6940.5	4134.47	7.51082	59.244	59.4293
PI546483	6940.94	4839.64	7.9129	60.5263	60.8032
PI340817	6941.28	4724.86	6.00718	50.9457	51.2037
PI520770	6941.28	4404.42	7.50536	59.3952	59.706
Ames30956	6942.88	4270.34	8.61336	65.3775	65.6438
PI601497	6944.49	4620.84	7.57788	60.6371	60.9256
PI391663	6945.18	4340.13	6.24788	51.8812	52.0312
PI535924	6946.15	3976.81	6.85414	56.1105	56.3936
Ames30970	6947.81	5017.59	8.1399	62.7969	63.058
Ames23468	6947.87	4920.05	6.26067	53.3469	53.5676
NSL30874	6947.9	5228.4	6.66516	54.6687	54.8442
PI601211	6949.07	4601.76	6.16177	51.1215	51.2504
Ames27125	6949.1	5664.14	7.46756	59.1193	59.3311
Ames23474	6950.57	4539.23	6.42447	53.8751	54.0712
Ames27052	6952.34	4595.52	5.74199	49.9051	50.0718
Ames23495	6954.09	4773.29	6.05621	52.0075	52.2367
Ames30942	6954.57	4512.78	7.5185	58.0318	58.4214
Ames20191	6955.42	4252.11	6.61077	54.6739	54.9419
Ames23473	6956.65	4830.65	7.91494	62.678	62.9192
Ames26119	6957.92	4729.76	6.94804	57.1763	57.465
NSL437982	6958.68	4504.82	7.13356	57.9988	58.2176
Ames21095	6960.26	4512.8	7.22073	57.9123	58.1272
PI639042	6962.1	4208.75	6.98656	56.2493	56.4385
PI601562	6962.13	5430.73	7.12138	57.4149	57.6381
CIze86	6962.22	5198.61	7.59686	60.6239	60.8267
PI543850	6962.39	3973.91	7.65233	60.0297	60.2876
Ames19004	6963.1	5043.02	8.67043	66.4211	66.6963
PI415091	6963.84	4803.04	6.20272	52.701	52.8989
PI600955	6964.92	4712.13	6.92336	56.2635	56.4251
PI548802	6965.48	4533.66	6.54669	54.2053	54.3711
PI340819	6965.79	4945.57	5.50947	48.5419	48.7023
Ames23476	6965.79	4229.8	6.98819	57.3545	57.5989
NSL22629	6965.85	4543.34	8.21237	64.7939	65.0734
Ames27044	6966.18	4639.22	7.72772	61.5003	61.7927
PI535925	6966.83	4190.51	6.97999	57.285	57.5534
PI257506	6968.54	4162.86	6.19872	52.5489	52.7514
PI601786	6968.63	4415.74	7.40659	59.3377	59.5928
PI550561	6969.17	4431.85	6.10635	52.1726	52.3621
Ames26774	6969.23	4497.04	5.4498	48.8256	48.9556
NSL28965	6969.6	4171.67	5.88291	51.2856	51.4388
PI601575	6969.6	4416.45	6.98754	57.1784	57.3697
PI641076	6969.76	4441.35	7.06508	58.2133	58.4025
PI542948	6969.94	4175.39	6.5224	54.2879	54.4748
Ames22750	6970.38	4820.84	7.14503	56.8503	57.0241
Ames31238	6970.42	4182.22	6.46023	53.5756	53.7514
Ames23465	6971.39	4995.36	8.17081	63.9833	64.2957
PI539871	6972.2	4319.76	7.27806	59.1308	59.3099
PI564852	6975.86	4919.42	6.15005	52.5553	52.7162
Ames26760	6976.95	4674.91	6.11944	52.8316	53.0215
PI535916	6977.5	4116.95	7.39079	59.7311	59.9843
Ames27107	6979.82	4095.73	5.32003	48.1363	48.3539
PI601457	6981.14	4681.9	5.71555	50.7005	50.8781
PI303925	6981.79	4514.48	7.40078	60.7864	61.1289
Ames12734	6981.86	5046.36	7.69258	61.796	62.0073
NSL30071	6982.03	4262.89	7.19435	58.0984	58.3103
PI587155	6982.44	4759.26	5.93614	52.2155	52.4135
NSL437968	6983.41	4424.08	7.36192	59.1178	59.3463
PI391678	6984.76	4202.4	6.80876	56.5103	56.7217
PI601571	6985.36	5028.83	7.89056	63.4829	63.7357
PI600959	6985.54	3940.56	5.6369	49.744	49.8867
Ames27158	6985.62	3922.31	6.44355	54.1685	54.3329
Ames23424	6989.47	5004.21	5.57955	49.7029	49.8639
Ames26784	6989.71	4329.62	7.43731	59.824	60.0413
NSL30074	6989.73	4984.29	6.38953	54.8729	55.0862
NSL437992	6990.16	4647.73	7.5281	61.5621	61.7483
NSL30872	6990.51	4686.14	6.76967	56.125	56.2716
PI565107	6991.7	4201.68	7.04719	57.3	57.5218
Ames30798	6991.77	3863.91	6.56922	55.0492	55.2079
Ames23444	6992.6	4704.17	7.0507	59.2241	59.4935
Ames23442	6993.12	4774.94	7.01124	57.956	58.1781
Ames19002	6993.29	4510.49	6.09579	52.3645	52.4726
Ames23395	6993.46	4442.07	7.35655	60.1088	60.3185
NSL32733	6994.29	4896.74	6.44993	55.0555	55.2486
Ames23392	6995.96	4882.87	5.07597	47.021	47.2239
NSL67793	6996.42	4670.02	7.39255	60.2548	60.4457
Ames23436	6997.03	4955.31	6.59036	55.7302	55.9467
Ames23451	6997.68	4456.88	6.0466	52.7217	52.8952
Ames27122	6997.72	4347.82	5.5236	49.444	49.5247
Ames28412	6998.5	5347.24	7.46991	60.5246	60.6943
Ames23710	6999.58	5044.61	8.23487	65.5415	65.8046
PI550468	7000.07	4290.51	5.76535	50.8186	50.9057
NSL30059	7001.98	4689.77	7.76123	63.2162	63.5146
PI601494	7002.67	5039.39	7.27741	59.1589	59.3247
Ames27047	7003	5025.24	6.40618	54.7077	54.9128
NSL65865	7003.86	4376.62	6.82546	56.8496	57.0316
Ames22439	7003.92	4678.39	7.47009	60.3547	60.5903
Ames23415	7004.65	4850.88	7.58893	62.1485	62.4051
NSL29304	7005.59	4698.3	8.14857	65.2852	65.4786
PI548830	7005.89	4660.37	7.10976	59.65	59.8751
Ames30857	7006.1	4540.55	5.78055	49.6456	49.8028
PI542959	7006.99	4162.23	8.02311	64.448	64.6817
PI601781	7007.2	4948.04	7.58476	62.4004	62.6535
NSL30879	7008.03	4530.83	6.56772	55.3952	55.5538
PI594072	7008.93	4649.54	5.9961	52.9158	53.0137
PI558524	7008.96	4002.03	7.11904	59.2317	59.3908
PI595616	7009.12	3898.11	5.78287	51.901	52.0751
Ames27069	7010.3	4548.12	7.15369	59.6792	59.8911
PI340825	7010.64	4637.69	5.48723	50.335	50.5425
Ames26116	7011.69	4855.35	6.69334	56.8008	56.9643
PI564683	7012.48	4426.55	6.50942	55.3156	55.4736
Ames27140	7013.63	4775.17	6.20343	53.3821	53.4847
PI550520	7014.56	4811.65	7.42783	60.8964	61.0958
Ames23396	7016.59	4733.12	8.20232	66.4353	66.7003
PI340824	7017.37	4645.32	6.58053	56.7056	56.8967
Ames26741	7018.73	4835.89	8.33746	66.7936	67.0346
Ames28290	7018.94	5090.11	6.7463	58.044	58.2399
PI405707	7018.96	4474.91	6.08679	53.4684	53.6838
PI601430	7020.5	4827.92	4.06609	41.9922	42.0636
Ames12823	7021.45	4266.15	6.87309	57.975	58.1055
NSL22893	7022.74	4659.15	6.00436	53.1474	53.2623
PI406128	7023.09	4526.63	7.2704	59.7287	59.9243
NSL437981	7023.54	4695.92	7.53775	61.7227	61.9277
PI601466	7025.44	4750.96	7.46897	61.5636	61.7924
PI601576	7026.15	4763.79	7.13405	59.957	60.1043
Ames27113	7026.17	4244.74	6.1207	53.8537	53.967
Ames30972	7026.45	4412.09	6.93086	58.6733	58.8235
PI614820	7027.64	4503.72	5.04835	47.3214	47.4133
PI550519	7027.87	4641.11	6.85011	58.4104	58.5794
Ames12816	7028.8	3945	5.59329	49.3988	49.4817
PI303929	7029.19	4333.85	5.79597	52.1871	52.2916
NSL91618	7030.37	5147.86	8.73722	70.5253	70.7411
PI594060	7030.74	4563.45	5.92097	52.7674	52.8917
NSL30068	7031.85	4572.35	7.79973	62.7648	62.9672
PI559916	7032.98	4683.53	7.4814	63.3571	63.5893
PI557569	7033.24	4739.67	6.63638	56.5701	56.6943
Ames23464	7033.27	4729.5	7.32949	60.5445	60.7273
PI561531	7033.51	4319.32	6.70432	57.3549	57.4905
PI651535	7033.77	4524.5	6.22693	55.2591	55.4138
Ames23407	7035.03	5359.72	7.25721	61.5237	61.6628
NSL197105	7035.57	5053.26	7.83465	64.4628	64.6784
Ames2327	7037.13	4434.38	7.2363	60.5224	60.6639
NSL438002	7037.15	5243.07	7.47843	62.399	62.5496
PI539872	7038.46	4340.61	6.58998	57.1903	57.3324
Ames23404	7038.52	4560.41	6.31249	55.7449	55.9124
PI601459	7041.77	4527.78	4.92486	47.4701	47.5466
PI594068	7041.85	4024.69	6.06709	53.5197	53.6454
PI550503	7042.14	5081.1	6.65909	56.9505	57.131
PI544065	7043.63	4377.43	7.12688	60.0775	60.2684
PI601300	7046.07	4564.48	6.78488	57.9702	58.1545
PI601230	7046.95	4415.26	6.11507	54.524	54.6637
PI543847	7047.36	4484.81	5.81417	52.3415	52.4317
PI559381	7049.52	4935.38	7.17316	59.9687	60.1827
PI614142	7049.71	4699.45	6.92501	59.6414	59.7986
Ames27163	7050.23	3715.45	5.13453	48.8975	48.9303
NSL30055	7050.4	5004.51	6.94796	60.7404	60.9258
PI559380	7050.5	4917.66	6.65594	58.1368	58.2692
Ames23490	7051.83	4840.02	6.77788	59.4523	59.6696
Ames27154	7052.16	4859.65	6.41386	56.2595	56.3958
PI601564	7052.18	4965.65	6.84789	58.5242	58.6687
Ames28365	7052.44	4196.94	6.60623	57.2694	57.4076
PI267171	7052.62	4158.99	6.50505	57.0276	57.1716
PI550527	7053.6	4270.19	6.02498	53.5425	53.6326
NSL30878	7055.43	4505.59	6.69312	57.8723	57.9676
PI601776	7056.31	4697.91	5.13824	48.8974	49.0071
Ames27020	7057.59	4740.84	6.87506	62.0381	62.2149
PI591015	7058.41	5185.99	8.07694	66.7336	66.8269
Ames10265	7058.47	4720.32	7.1609	61.2779	61.4028
PI558532	7058.9	4873.11	6.82007	58.6963	58.8578
PI607522	7059.19	4149.89	5.13941	49.9606	50.1329
Ames23393	7060.49	5053.01	6.91562	60.139	60.3351
PI601172	7060.55	4838.45	7.58126	63.6824	63.864
PI601773	7061.34	4490.59	5.57505	51.5761	51.6822
Ames19319	7061.45	4631.19	7.49416	62.3765	62.5002
Ames10271	7062.12	5274.38	4.30495	44.4477	44.4857
PI340822	7062.14	4653.1	5.80628	53.2666	53.4503
Ames14116	7062.37	4950.67	6.3594	56.1741	56.2585
NSL438022	7062.76	3902.37	6.80627	58.7687	58.8688
PI200196	7062.83	5034.99	6.22153	55.0737	55.1914
PI340818	7062.85	4079.75	6.66496	52.3773	52.7302
PI601004	7063.61	4353.91	6.24368	55.8984	56.0596
PI406127	7064.25	3799.11	5.40725	49.8356	49.9841
PI601376	7065.09	5139.74	6.99378	60.2848	60.4851
PI658076	7065.15	4501.23	5.65011	51.3646	51.4397
PI539923	7066.05	4779.57	6.36754	56.5008	56.6187
Ames26795	7066.31	5069.78	8.23718	67.962	68.1662
NSL437996	7067.49	4447.85	6.41585	56.9612	57.0809
PI601780	7067.69	5549.46	6.60049	58.4563	58.635
Ames24743	7067.93	4707	7.06928	60.9532	61.1049
PI601417	7068.52	4925.62	6.20986	56.0536	56.1444
PI658083	7068.73	4670.92	6.49823	57.5446	57.6309
Ames26770	7069.04	4816	6.20357	55.9206	55.9946
PI601774	7069.11	5071.24	5.53567	51.1127	51.1921
Ames19330	7069.4	5142.73	6.26482	56.5445	56.6878
PI561532	7069.98	4922.92	5.7945	53.1516	53.2745
NSL30903	7071.01	4166.7	6.7339	59.2454	59.3462
Ames23428	7071.49	4556.91	6.68997	59.5197	59.7152
NSL22632	7073.92	5212.61	7.89013	68.1979	68.3872
PI601080	7074.9	5160.68	7.37991	63.5746	63.7641
Ames27036	7076.16	4630.42	5.56138	51.992	52.1625
Ames24704	7076.21	4312.11	6.45094	57.7506	57.8986
Ames26793	7077.23	4970.96	6.25336	55.9966	56.1031
CIze27	7077.31	4908.72	5.96012	54.7331	54.827
Ames30908	7077.53	5264.17	5.86892	53.3328	53.4892
Ames12815	7077.84	4643.55	6.30677	57.1282	57.2999
NSL42873	7078.37	4543.04	5.87105	54.0313	54.2
Ames24734	7078.83	4539.17	6.64444	58.5044	58.6632
Ames19327	7079.03	5265.88	6.63242	58.8932	58.9924
PI561529	7079.15	4656.47	5.91567	54.1892	54.2872
Ames27213	7079.17	4773.14	5.79802	52.3474	52.4988
Ames26134	7079.46	4411.69	6.03566	54.9296	55.0886
Ames23441	7079.75	4849.2	6.87066	61.4249	61.6427
PI550531	7079.88	4611.86	7.3319	62.7861	62.9702
PI601079	7080.2	4223.78	5.64802	52.7097	52.8225
Ames19003	7080.47	4022.65	6.23492	56.0105	56.174
Ames24725	7081.19	4480.11	6.3468	57.3212	57.4765
PI561518	7082.16	4235.24	6.22449	55.8771	55.9555
Ames24744	7083.13	4625.47	5.93773	54.4456	54.5331
Ames31251	7083.23	4474.97	6.82076	58.9851	59.0939
PI340874	7085.14	3810.15	5.15254	49.8481	49.9454
PI594074	7085.82	4510.93	6.34827	57.6898	57.7653
NSL30053	7087.07	4805.45	6.88911	59.9479	60.0555
PI601150	7088.77	4459.37	6.42737	57.4341	57.5446
Ames28937	7089.37	4837.08	6.75962	59.6608	59.7833
PI601784	7092.7	5517.34	8.43907	69.7015	69.9075
Ames23455	7092.99	4567.82	6.53288	59.3498	59.5257
PI406122	7093.31	4563.47	5.50366	51.7564	51.8379
NSL437895	7095.55	4552.62	7.98208	67.8174	67.9598
PI639500	7096.04	5268.55	7.51476	65.2519	65.3149
Ames30855	7096.09	4340.42	7.066	62.5582	62.6695
PI639040	7096.35	4542.55	7.02049	61.9204	62.0745
NSL30862	7096.47	4555.16	6.57904	58.279	58.3776
NSL30046	7098.48	4251.28	6.91097	60.8608	60.985
NSL29303	7098.74	4702.47	7.39987	63.2205	63.3722
PI601208	7099	4488.2	6.09227	55.5496	55.6352
PI550695	7099.19	4751.82	7.62528	64.8228	64.9757
PI559946	7100.18	4759.83	8.22906	68.612	68.7668
PI601570	7100.58	5223.33	6.80804	60.8616	60.9746
PI601360	7101.13	4367.51	6.19964	56.9835	57.1132
PI535926	7102	4889.35	6.69491	59.8108	59.9954
PI535917	7102.18	5006.89	5.6052	54.4266	54.5766
PI520771	7102.22	5253.63	6.81388	67.2502	67.3
Ames23400	7102.63	4511.79	7.60619	64.5821	64.7373
Ames26789	7103.28	5154.42	6.59595	58.8952	58.9951
PI594065	7106.02	4939.88	6.51149	59.3858	59.4508
PI531509	7107.07	4360.57	7.35834	64.1959	64.2954
PI600751	7107.07	5083.95	6.58175	58.7495	58.8157
PI550555	7108.54	4285.95	5.81039	54.4597	54.5305
PI540312	7108.76	4499.53	5.73032	53.9931	54.0507
NSL437947	7108.8	4039.42	6.1636	56.3914	56.4991
PI595367	7108.8	4276.61	6.45205	59.0341	59.1317
PI587152	7109.27	4317.27	6.30165	57.8348	57.9595
PI648423	7109.64	4642.66	5.97325	55.0663	55.1451
NSL30866	7110.49	5114.32	8.07944	68.6417	68.7597
Ames19321	7111.56	4792.29	6.44345	58.5397	58.6349
PI587125	7111.89	4470.48	4.72632	48.1214	48.2119
Ames26790	7112.33	3959.34	5.90174	55.807	55.8935
Ames24733	7113.79	4401.64	6.17301	57.4401	57.5494
PI596355	7115.25	4579.17	6.82734	60.5941	60.6529
Ames23434	7116.3	4324.45	6.93826	61.6444	61.8057
PI601009	7116.93	4896.31	6.75173	61.7833	61.9243
PI639503	7118.15	4726.67	6.62912	59.8808	59.9602
Ames22756	7118.17	4763.96	5.55812	53.4169	53.4774
Ames23433	7118.23	4598.01	6.28224	58.5713	58.6803
PI642765	7118.93	4438.73	6.50448	58.1515	58.2516
PI415078	7119.76	4728.79	6.37937	58.2853	58.4404
PI587153	7120.3	4558.48	4.16309	45.1743	45.2225
Ames22767	7121.68	4833.79	6.34759	58.4041	58.5089
CIze89	7122.21	4924.56	6.69359	60.196	60.2799
NSL32720	7122.67	4516.45	5.53565	51.9483	51.9947
PI601568	7123.14	4409.04	6.57033	59.4071	59.456
Ames23469	7124.48	4706.16	5.75849	54.9289	55.0077
PI391662	7125.21	4164.71	5.22995	51.5413	51.5409
Ames30935	7125.83	4520.49	6.3986	58.5374	58.6703
Ames19012	7125.88	5024.64	5.85055	54.6947	54.7546
PI506254	7126.14	4532.91	7.29578	65.1471	65.2726
Ames12822	7126.84	4421.74	6.08186	54.0831	54.4664
PI606329	7127.85	5220.5	7.56026	66.2948	66.422
Ames23403	7128.72	4356.07	6.13243	57.1579	57.2614
NSL437914	7130.09	4786.18	7.06556	64.4236	64.5369
Ames27132	7130.97	4701.03	5.86708	55.3673	55.4091
Ames27165	7130.97	4537.44	4.92015	49.074	49.1087
NSL53086	7132.08	4213.36	5.7194	54.5644	54.6162
Ames22748	7134.68	5156.5	6.91491	62.9367	63.0127
PI559921	7136.03	4463.47	6.44396	59.2275	59.2834
PI535921	7136.08	4690.68	6.97689	62.7255	62.8713
Ames24717	7138.45	5002.38	7.18629	64.2161	64.2563
NSL30894	7138.95	5018.45	7.23242	63.6757	63.7872
Ames26747	7139.15	4908.91	6.74691	61.8725	61.9273
Ames26021	7139.17	4025.09	5.43557	53.9003	53.9634
Ames19013	7139.56	4878.1	5.29479	51.6508	51.6821
Ames19323	7139.56	4701.34	7.57815	67.2636	67.3761
NSL30905	7139.56	4851.05	5.93088	55.9791	56.0325
PI597927	7139.68	4076.66	5.8465	55.9975	56.015
PI539927	7140.47	4831.5	6.78051	62.0218	62.08
NSL42877	7143.19	4569.52	7.27897	65.5396	65.6843
Ames30966	7143.79	4937.57	5.48818	51.921	51.9743
Ames25220	7147.06	5426.28	7.3966	65.0123	65.1274
Ames27187	7147.44	5340.17	8.27248	70.6777	70.7821
PI594066	7148.74	4352.96	6.29678	58.4157	58.4731
PI303936	7149.65	4692.13	7.29257	64.5979	64.6629
Ames12730	7149.71	4681.62	6.74207	61.7103	61.7576
Ames28367	7152.2	5071	6.37827	59.8529	59.9161
Ames20190	7152.28	4968.18	6.7296	62.1255	62.2476
PI257508	7152.67	4828.13	5.70679	55.4301	55.5208
PI601442	7153.5	5213.75	6.155	57.2582	57.2796
PI601440	7153.91	4816.04	5.03718	50.288	50.302
NSL30038	7155.43	4328.47	6.39108	59.4101	59.4395
Ames24739	7158.19	4193.29	5.57113	53.8716	53.9534
Ames27182	7158.9	4538.83	5.54518	55.7935	55.9054
NSL30066	7158.93	4613.63	6.2171	58.0817	58.182
Ames30792	7160.52	4512.61	6.28377	59.6029	59.6505
Ames22753	7161.01	4740.23	6.35255	60.3797	60.4257
PI559953	7161.05	5009.43	6.62143	61.259	61.3245
PI561516	7161.19	4372.85	6.01774	57.3214	57.4134
Ames19328	7161.8	4319.22	5.62232	54.7456	54.7428
Ames23429	7162.2	4626.05	6.9584	63.7972	63.8752
Ames30952	7164.74	5235.7	7.18091	65.0567	65.1206
PI186197	7164.99	4732.91	5.53713	54.1907	54.2289
PI601782	7165.3	4960.33	6.58642	60.7655	60.8239
PI558527	7166.17	5246.31	6.98585	64.7761	64.8569
Ames27219	7168.43	4798.61	6.44958	60.6878	60.7844
PI601789	7169.26	4897.02	6.84805	62.8576	62.9314
PI562381	7169.33	4225.18	5.50838	54.5716	54.6716
PI543840	7169.36	4632.32	5.58297	54.5881	54.6215
NSL438033	7169.72	5068.58	7.66001	67.8776	67.9391
NSL438034	7169.98	5281.67	7.67959	68.6048	68.6641
PI559938	7170.82	4545.02	4.92922	49.2541	49.339
NSL32735	7172.29	4325.54	5.70341	55.6308	55.7058
CIze90	7175.02	4548.36	6.91675	64.6101	64.6576
PI415090	7175.08	4498.77	5.34645	53.8872	53.9525
Ames27185	7175.67	5085.85	7.52997	68.242	68.3311
PI221789	7177.28	5223.88	7.71165	68.6825	68.762
PI594069	7177.76	4563.86	5.14148	52.0401	52.0186
Ames23389	7180.03	4979.3	6.74277	64.477	64.5444
Ames23422	7180.36	4669.24	6.40791	60.8736	60.9577
NSL30073	7180.63	4609.24	6.57632	62.1742	62.27
Ames19016	7181.92	4663.7	5.15686	52.9144	52.9306
Ames27157	7182.15	4120.55	4.75519	50.3637	50.3296
Ames23449	7183.27	4958.81	7.10278	66.1944	66.3139
PI539921	7184.59	4391.67	6.18118	59.6469	59.7254
Ames30950	7185.33	4526.87	5.7996	56.8169	56.8394
Ames26768	7186.54	4570.84	6.381	61.1653	61.2064
Ames23457	7187.16	4284.48	4.1189	47.5238	47.5787
NSL437989	7187.42	4887.95	6.54028	61.8305	61.8813
PI267169	7187.49	4435.93	5.62819	56.3413	56.397
NSL30865	7189.1	4492.04	5.77991	56.6737	56.7114
NSL437964	7189.88	4530.91	5.78508	56.5105	56.541
PI594070	7191.3	4821.27	5.50223	56.2783	56.3003
Ames24747	7193.21	4512.3	7.25835	66.7676	66.7983
Ames27051	7193.87	4487.76	6.10612	59.357	59.3547
Ames24736	7194.07	4821.11	6.25842	60.3487	60.3915
PI186195	7194.15	5570.03	6.55296	62.5015	62.5458
PI594080	7194.53	4589.49	6.14235	58.7111	58.7154
PI550456	7194.83	5081.44	7.61682	69.9327	69.9835
NSL437966	7195.63	4295.6	5.55753	55.6312	55.6895
Ames23478	7196.05	4674.46	4.68481	50.3471	50.32
Ames23452	7196.21	4579.79	6.24738	60.3984	60.4712
PI651536	7196.95	4281.92	6.22453	59.5911	59.641
NSL437928	7197.61	5382.27	6.37889	60.4003	60.4577
Ames12817	7197.64	4201.89	5.70786	56.834	56.862
PI340830	7198.59	4470.65	5.02853	52.3485	52.3743
PI542954	7199.06	4003.74	5.54203	55.3419	55.3422
Ames31236	7200.38	4295.52	5.8265	57.1657	57.1884
Ames24712	7201.21	4400.89	5.04489	53.071	53.076
PI594053	7201.55	4333.47	5.91091	58.4015	58.427
PI601573	7201.82	4838.56	6.26785	60.8727	60.9183
Ames31246	7201.97	4612.74	4.96438	51.8752	51.8868
Ames24715	7203.74	5200.26	6.34427	62.877	62.9773
Ames23423	7204.14	4661.1	6.01217	59.3069	59.375
Ames19008	7204.2	5003.79	5.67583	56.5658	56.5807
Ames27142	7204.25	4737.47	5.86522	58.1783	58.2081
PI535901	7204.93	4745.86	5.35086	54.9579	54.9952
PI531085	7207.75	5249.58	5.93131	59.6171	59.6132
PI587128	7210.07	4110.7	4.67985	50.9242	50.9314
PI601726	7210.49	4849.49	6.22659	61.3473	61.4105
PI550470	7212.17	4452.6	6.06359	59.7407	59.7534
PI594059	7212.45	4334.31	6.18159	60.8276	60.8633
Ames25373	7213.19	4698.72	6.6262	63.3573	63.3916
PI587124	7213.4	4410.35	5.28519	55.4183	55.4547
NSL437927	7214.93	4681.93	5.37139	55.8688	55.904
PI601612	7215.16	4941.66	6.10945	60.8438	60.8623
PI600729	7216.02	4925.73	5.2309	54.3096	54.3034
Ames27070	7218.43	5122.86	5.5675	57.6649	57.7889
Ames24711	7218.43	4595.29	6.23761	61.547	61.5948
NSL30906	7218.75	4190.19	6.47835	62.4394	62.4643
NSL242483	7219.28	4801.42	6.5053	64.8382	64.8685
PI564716	7220.87	5112.3	6.99332	65.8647	65.9042
PI552815	7221.42	4922.12	5.84972	57.9638	58.0229
Ames27031	7221.6	5020.68	5.15267	55.7642	55.8121
PI594077	7221.84	4058.36	5.65518	57.3557	57.3603
PI559918	7222.9	4704.21	5.46576	55.3573	55.4142
PI537099	7223.17	5145.7	6.02778	59.408	59.4244
PI601686	7224.16	4885.11	5.52507	56.9663	56.9452
NSL437930	7224.42	4952.49	5.64832	57.6018	57.5721
CIze3	7224.6	4647.15	4.22503	47.6241	47.607
Ames24713	7225.51	4523.92	6.38752	61.5826	61.6029
PI405706	7225.97	4496.1	5.40392	56.0694	56.0992
PI601037	7227.93	4778.04	5.24675	54.6355	54.6236
NSL30890	7230.65	5084.03	7.08933	67.1636	67.1273
Ames30965	7230.91	4910.33	5.67498	57.2976	57.2827
PI619429	7231.2	4393.53	4.88562	52.5104	52.4535
PI508277	7232.96	5076.33	6.28951	61.3279	61.3403
PI651544	7233.2	4720.48	5.88285	58.9497	58.9372
NSL30880	7233.31	4910.01	6.73966	64.8729	64.8967
PI506258	7235.57	4723.02	5.64922	58.7862	58.7783
Ames27204	7235.59	4834.76	5.68658	59.3531	59.3478
PI510674	7237.18	4097.96	5.13127	48.0194	50.3015
PI648429	7239.6	4985.14	6.68034	64.0249	63.9852
Ames12736	7240.87	4812.35	6.10243	61.9953	61.9992
Ames27162	7241.94	4003.39	4.54542	50.9046	50.8268
PI568159	7242.06	4595.1	5.75488	59.8544	59.887
PI639050	7242.21	4276.11	5.56603	57.1672	57.1732
PI594049	7242.51	4512.14	5.52117	57.3971	57.3998
Ames23443	7243.06	4363.88	5.75289	60.0681	60.1317
NSL30907	7243.38	4415.88	5.37033	55.4736	55.4501
PI604606	7244.16	4738.42	5.97951	60.158	60.123
Ames23486	7244.92	4907.08	5.24016	56.008	56.071
PI539926	7244.97	4933.69	6.51329	64.3253	64.349
Ames24742	7245.28	5030.67	6.44097	62.8216	62.848
NSL437994	7245.49	4773.31	6.30417	62.5731	62.5422
Ames31242	7249.27	4974.46	7.07139	67.7251	67.7467
Ames30963	7250.32	4786.91	5.45741	56.7533	56.7421
NSL22630	7250.39	4449.83	6.23486	61.7439	61.7109
Ames10247	7252.55	4823.46	4.36147	50.0799	49.9856
Ames26909	7257.71	5249.7	4.19608	47.9402	47.8979
PI658087	7257.74	5400.33	5.9401	59.82	59.845
PI601210	7258.82	4759.48	4.85293	53.4147	53.3759
PI550469	7260.51	4912.18	6.44626	64.4657	64.4079
PI303941	7260.89	4533.99	4.84303	52.74	52.6984
PI594064	7260.89	4707.99	5.07242	54.6415	54.6032
Ames30964	7261.44	4969.34	5.32715	56.4408	56.4221
PI601008	7262.07	4698.08	5.8303	59.2579	59.2122
PI303943	7262.49	4677.8	4.68211	51.1608	51.1158
Ames27150	7262.6	4614.59	6.01075	61.5547	61.507
Ames19000	7262.92	4636.24	4.31139	48.9067	48.8937
Ames24710	7263.2	4532.02	5.37863	56.8843	56.8525
Ames30534	7263.27	4662.62	5.81658	60.0433	59.9906
PI638550	7263.28	5624.59	5.86095	61.6162	61.6
NSL81599	7265.2	5300.9	6.42617	63.3713	63.382
PI548838	7265.71	5104.92	6.88886	67.6269	67.643
PI559383	7266.89	4450.85	5.85693	60.3552	60.3402
NSL438039	7267.41	5192.71	6.66091	66.3763	66.3667
PI601783	7268.44	4807.29	5.81984	60.5009	60.4553
NSL65863	7269.12	4181.31	5.12739	54.8248	54.7824
PI548794	7269.86	4580.59	5.76683	60.8248	60.8677
Ames27137	7270.3	4378.15	5.73841	60.028	59.9886
Ames19293	7270.31	5116.71	7.12172	69.2342	69.1961
NSL65871	7271.1	4531.43	4.96822	54.5653	54.481
NSL30058	7272.05	4085.74	5.16341	55.6166	55.6682
PI601569	7272.72	4907.09	5.8313	60.5633	60.5126
Ames31235	7273.53	4158.96	5.04294	54.4772	54.4463
Ames27025	7275.29	4815.38	5.64947	59.3727	59.4122
PI642762	7275.39	4883.82	5.71161	59.5793	59.5569
Ames27196	7275.82	4474.61	4.34203	50.4084	50.3466
PI267167	7275.95	4542.25	5.48727	58.3682	58.3533
PI601727	7277.3	5038.04	5.39972	58.6063	58.6215
PI550568	7277.54	5467.85	6.62353	65.2941	65.2921
Ames19287	7278.27	4892.89	5.49571	58.0489	57.9795
Ames12727	7279.41	4118.01	5.36907	57.4718	57.4444
PI601499	7281.26	4966.28	4.87504	54.1973	54.1498
Ames30955	7281.77	4400.65	4.91234	53.685	53.6462
NSL30070	7283.28	4692.44	5.94462	62.7706	62.7818
Ames23481	7284.06	4936.72	6.57481	65.7597	65.7569
PI594081	7286.19	4428.18	5.37813	57.5537	57.5507
PI535919	7286.52	4688.73	5.91663	61.4638	61.4932
NSL30884	7286.66	5585.64	3.47235	44.0767	43.9975
PI603939	7286.7	4267.79	5.47102	58.2095	58.146
Ames22442	7287.15	4720.06	5.13822	57.147	57.1416
Ames27146	7287.37	4678.14	3.55622	44.5332	44.489
NSL42804	7289.24	4098.16	5.94025	61.6375	61.6058
PI340827	7290.15	4518.15	4.86039	54.5965	54.5865
PI594062	7290.39	4055.32	4.33849	50.4144	50.3734
Ames27180	7290.65	4676.87	5.60414	60.4471	60.4178
PI340812	7290.7	4953.96	4.9595	54.8845	54.8206
PI658078	7291.74	4769.47	5.7806	62.3838	62.3601
Ames30941	7292.71	5066.35	5.66415	59.8601	59.8501
NSL437923	7294.03	5696.63	6.83973	68.5472	68.5454
PI648430	7296.36	5127.99	5.22195	57.1577	57.0813
Ames27450	7296.96	4784.79	5.22985	57.0705	57.0272
Ames24746	7299.3	4917.42	6.64497	67.3752	67.3568
NSL22628	7300.88	4069.95	3.49594	44.0892	43.958
Ames26028	7303.69	5119.07	5.83291	63.6514	63.6246
PI550455	7304.87	4974.6	6.80109	69.128	69.0708
NSL53081	7305.45	4603.34	4.81069	54.1048	54.0456
PI550532	7306	4804.25	5.92084	62.6348	62.6473
Ames28366	7307.09	5155.01	6.71469	68.4398	68.3734
Ames27039	7310.5	4875.81	5.57258	60.2689	60.2816
PI601495	7310.83	5090.54	5.86816	62.7093	62.7013
PI601301	7313.09	4753.93	4.47936	50.48	50.4398
PI561515	7314.47	5323.07	5.74362	61.9702	61.9152
PI236997	7314.82	4766.16	4.68507	54.5123	54.4822
Ames23397	7317.62	4651.82	5.67078	61.6148	61.5963
Ames27178	7320.86	4923.89	4.95446	54.9776	54.8985
Ames19001	7321.26	4769.65	4.82089	54.2083	54.1044
PI601270	7321.33	5194.87	6.88217	69.349	69.3231
Ames28939	7321.92	4740.87	6.08159	64.6312	64.559
PI303924	7322.02	4535.21	4.79592	55.7981	55.7664
NSL437993	7322.59	4810.87	5.75806	62.8628	62.7824
Ames22440	7322.61	5057.68	6.63438	68.4918	68.4553
PI601322	7324.12	4688.34	4.18653	50.0293	49.9576
NSL437988	7324.43	5114.06	5.48892	60.9711	60.8742
PI658089	7324.63	4765.35	5.59794	62.1806	62.1427
Ames23493	7326.79	5142.21	5.7062	61.438	61.3756
Ames24722	7327.08	5339.58	5.73917	62.8438	62.8248
PI601317	7327.08	5707.72	6.14891	65.4761	65.4638
PI559919	7327.15	4339.5	5.78241	62.1992	62.1732
Ames27021	7327.86	4738.01	5.18062	58.4657	58.4043
PI557563	7328.36	4740.26	5.64581	61.6958	61.6393
Ames23497	7329.71	4204.42	4.71463	54.7954	54.777
PI594076	7331.44	4617.52	5.90269	63.4593	63.3558
Ames24735	7331.66	5169.95	6.85608	71.2142	71.1418
Ames30790	7332.1	5245.76	5.52681	60.6996	60.639
Ames26484	7332.91	4682.93	5.59742	57.4513	57.9783
Ames31239	7333.16	4341.3	4.55098	52.3981	52.4027
Ames12818	7333.54	5560.83	5.19029	58.2914	58.2257
NSL81596	7334.72	4908.26	5.81321	63.4037	63.3146
Ames26786	7334.86	4534.07	5.62808	60.7365	60.6639
PI546482	7335.3	4121.42	4.19936	50.6847	50.6032
PI559917	7336.67	5044.16	6.16277	65.4999	65.4638
PI601567	7338.8	4987.25	5.76129	62.6662	62.6089
Ames8396	7339.86	4953.96	5.14967	58.55	58.4746
PI427109	7341.73	5190.52	6.4744	67.8761	67.8281
PI648425	7341.92	5166	4.87784	55.9547	55.9149
PI561522	7342.08	4592.9	5.08891	57.2043	57.1233
NSL32732	7344.69	4721.12	5.32416	61.954	61.9148
PI658088	7348.64	4929.47	5.54301	61.8125	61.7557
PI607519	7349.55	5192.84	5.1271	58.3331	58.3226
Ames31249	7353.72	5056.33	5.66427	62.9565	62.8826
PI607512	7354.44	5662.71	6.57473	70.6134	70.506
Ames30794	7354.79	5571.48	5.53435	61.5835	61.5004
PI639045	7355.46	4739.77	4.8194	56.6987	56.6252
PI601493	7359.65	4931.06	4.14669	53.9373	53.9316
Ames14111	7359.84	4779.07	5.64521	62.6641	62.5899
PI651539	7362.54	5396.83	5.77064	64.4951	64.4222
Ames30865	7362.67	4859.11	4.50524	53.8683	53.7681
Ames22755	7362.85	4652.89	5.05143	58.7267	58.6364
PI543842	7363.07	5048.15	5.13664	59.1152	59.0158
PI406123	7364.52	5111.64	4.22364	51.4638	51.36
Ames31234	7364.8	4934.36	4.91084	57.5101	57.4098
Ames27193	7364.94	4771.84	5.56492	62.5741	62.4848
Ames31240	7365.21	4293.77	4.7219	55.701	55.6032
NSL30861	7365.59	4863.23	5.92549	65.0954	65.0142
PI658075	7369.22	4432.64	6.03103	61.6987	61.6358
PI593013	7369.5	4694.8	4.57189	54.2919	54.2185
Ames30867	7372.16	4681.3	4.32939	52.476	52.3926
Ames26525	7373.77	4615.8	5.66576	64.0281	63.9369
PI198893	7374.52	4174.65	6.13719	59.346	61.2119
PI561525	7374.56	5008.55	6.25961	68.0317	67.9227
Ames27045	7374.63	4579.66	3.96247	49.9719	49.9119
NSL32734	7375.4	4542.42	5.00034	58.7916	58.7001
PI601377	7376.34	5249.93	5.33293	63.0438	62.9812
NSL30060	7376.47	4123.92	5.03405	58.5648	58.4568
PI391670	7378.15	4386.21	3.36243	47.1724	47.1684
PI594048	7379.08	5165.57	5.41029	61.5976	61.4672
PI561523	7379.77	4965.34	6.09731	67.4129	67.3293
PI587140	7380.35	4842.12	5.22857	59.9533	59.8531
PI601808	7380.75	5150.31	4.85966	58.8633	58.7849
PI658080	7381.53	4747.82	5.26502	60.5888	60.5021
Ames26115	7382.43	5088.43	5.27859	61.1113	61.0897
Ames26794	7382.56	4678.79	5.82548	65.3754	65.2502
PI550521	7383.11	4697.02	5.30096	61.1544	61.0227
NSL437929	7383.25	5062.64	4.91102	57.296	57.1888
PI560316	7383.83	4970.6	5.23881	61.4663	61.4132
PI555462	7385.28	5253.83	4.47491	53.7767	53.6594
NSL30885	7386.12	4738.1	4.35037	53.9051	53.7898
PI600772	7386.38	4612.69	5.15298	59.6644	59.5771
PI606769	7388.52	4491.35	4.6509	56.3404	56.2211
PI601583	7389.59	5023.04	5.20563	60.6916	60.5868
NSL30901	7390.34	5087.45	5.10737	60.4397	60.3331
PI607521	7391.76	5237.8	5.15884	60.6194	60.5502
Ames27068	7392.36	5019.21	4.66282	58.3844	58.3323
Ames23399	7393.61	4893.84	5.53524	64.4176	64.3204
Ames27138	7394.17	4664.13	4.82878	57.9626	57.8303
PI559949	7403.89	4598.03	4.85699	58.6504	58.5319
Ames19097	7406.17	5407.74	5.20184	61.1696	61.0559
Ames30797	7406.17	5271.19	4.93797	60.9243	60.8267
PI658081	7406.31	4720.08	4.75712	59.999	59.9449
PI594085	7406.55	3977.39	4.14727	52.8088	52.6875
PI651530	7406.98	4858.35	4.61115	55.1349	55.0313
NSL22631	7407.24	4982.73	5.8902	68.032	67.9171
Ames26128	7408.81	4931.67	5.3675	65.0443	64.9332
PI658073	7411	5315.76	4.83147	58.3607	58.2514
Ames19309	7411.7	5123.54	5.25849	62.5627	62.4422
PI537097	7411.78	4714.48	4.59915	58.052	57.9656
PI601402	7411.86	4634.06	4.45268	55.9799	55.8973
Ames24749	7413.64	4361.72	5.05469	62.31	62.1595
Ames30973	7413.68	5342	5.48233	64.1611	64.0368
Ames23402	7414.78	5325.48	4.94489	59.5181	59.3831
Ames27177	7414.87	5867.67	5.4744	63.9041	63.7878
Ames23421	7415.32	4865.16	4.43937	58.6992	58.5694
Ames26745	7417.13	5140.68	5.52756	65.1507	65.013
PI565105	7417.7	4877.4	5.36301	63.8241	63.7018
PI601375	7419.61	5103.92	4.5992	56.3758	56.2498
PI601159	7422.23	4732.47	4.43513	55.5851	55.4172
NSL65869	7423.34	5412.89	5.25193	63.0703	62.951
Ames28422	7423.84	4954.3	4.66527	58.3002	58.1518
PI522250	7424.94	5080.08	4.9063	60.7336	60.6735
Ames24707	7425.54	4874.76	4.68299	58.6603	58.5938
Ames19316	7426.35	4630.67	4.46966	56.7101	56.6122
PI538011	7427.26	4280.21	3.60931	49.4344	49.2863
PI518660	7428.61	4755.22	4.54304	58.2888	58.189
Ames23438	7428.76	5977.06	6.56995	74.3589	74.288
Ames26757	7430.01	5121.69	6.14336	69.5492	69.394
Ames27038	7430.99	4766.66	4.4059	56.4052	56.3521
Ames26772	7431.42	4481.19	4.99219	61.1113	60.9678
Ames27152	7433.52	4708.58	3.77096	51.4534	51.312
PI550462	7434.36	4770.07	4.64297	58.1794	58.0529
Ames26746	7435.38	4924.1	5.00585	61.1498	60.9857
NSL68242	7439.99	4429.53	4.69343	58.1826	58.0504
PI607527	7440.71	4500.28	4.56465	58.0817	57.9739
PI642766	7440.8	5301.8	4.5574	56.6484	56.5202
PI548790	7441.22	4766.73	3.37348	47.2094	47.1723
PI559944	7441.6	5132.78	4.38429	55.5259	55.4179
Ames19308	7441.92	4682.72	3.95265	52.8022	52.6932
PI601329	7443.6	4849.4	3.84904	53.2182	53.0971
Ames26138	7443.71	4496.94	5.09483	62.7593	62.5903
Ames31243	7446.44	5133.58	5.50358	66.8289	66.6851
Ames19326	7449.79	4612.16	4.60032	58.0923	57.9818
Ames27211	7452.62	5056.02	4.28819	53.5683	55.779
Ames23487	7452.83	5098.43	5.47039	66.3974	66.2784
Ames27040	7452.95	4642.37	4.36641	57.1949	57.0929
PI594067	7453.39	5246.42	3.55961	50.4321	50.2399
NSL437995	7454.35	5037.6	4.48122	58.1606	58.0347
Ames23425	7457.79	4965.92	5.61068	67.4743	67.4102
PI558529	7459.07	4776.97	5.56494	67.1848	67.0223
PI568158	7459.18	4968.75	5.11524	64.0163	63.845
PI601777	7460.12	5006.45	4.89452	61.4764	61.2991
PI592733	7461.21	4457.68	4.61602	59.0858	58.9442
PI601026	7461.96	5040.58	4.34147	57.1771	57.0557
PI658085	7462.58	5262.59	5.22525	65.209	65.0622
PI601191	7464.42	4878.17	4.72335	59.6585	59.4766
NSL29284	7464.64	4740	4.33987	56.5303	56.3965
PI604605	7465.57	4940.7	4.73116	59.0082	58.8473
PI547088	7467.79	4963.77	5.32985	65.8343	65.6559
Ames24751	7469.74	5299.24	3.52359	50.4505	50.2634
PI537101	7469.85	4734.25	4.63916	60.4247	60.2638
NSL34374	7470.57	5457.95	5.08178	63.6567	63.5564
Ames27053	7470.88	4604.31	4.68615	60.3398	60.1526
NSL437920	7471.15	5688.78	5.31204	65.671	65.4846
PI406112	7471.18	5301.98	4.11817	55.6697	55.4708
PI550566	7471.36	4985.63	5.0018	63.7858	63.6471
PI550567	7472.32	5669.21	5.7737	70.3003	70.1916
PI562380	7472.53	4589.87	4.63523	59.0419	58.9437
PI557566	7473.89	4716.18	4.79407	62.0874	61.9317
Ames27034	7474.48	5131.49	5.42971	66.6008	66.4855
PI542941	7474.96	5063.94	5.54761	69.071	68.9064
PI554612	7475.06	4717.85	4.41015	57.6107	57.5152
PI659679	7475.11	5176.83	4.80414	62.9324	62.7494
Ames10252	7475.39	5483.48	3.65301	51.2636	51.1409
PI517968	7475.83	4748.99	4.96843	63.4749	63.3653
PI200193	7476.07	5384.11	4.46303	59.5018	59.3283
NSL243016	7477.01	5322.36	5.47967	66.1543	66.0005
Ames23394	7478.95	4766.79	4.24786	56.8965	56.8162
PI535923	7479.97	4513.89	3.69683	52.2336	52.1731
Ames31241	7480.35	4567.61	3.75053	52.1169	51.963
PI639497	7483.31	5318.16	5.0009	63.6142	63.4592
PI406125	7483.44	4628.21	4.09837	55.5886	55.4203
CIze45	7487.49	4845.09	5.19039	65.7562	65.5436
PI641247	7488.02	4967.15	3.90648	54.2937	54.1168
NSL29317	7494.6	4696.53	5.00698	63.9181	63.7129
PI639053	7496.26	4998.22	4.05643	55.4498	55.2976
Ames26022	7497.56	5227.43	4.91618	63.1672	62.9597
NSL32726	7497.68	4986.99	3.14578	48.67	48.6092
PI601470	7499.34	5229.87	3.52958	51.718	51.5407
Ames27057	7501.44	5159.98	3.28021	49.8056	49.6798
Ames28420	7503.23	5246.14	4.47371	60.4315	60.2224
PI594079	7503.57	5371.17	5.74467	70.5292	70.3503
PI538007	7504.92	5299.47	4.04423	55.5895	55.4413
Ames23471	7505	5500.71	4.54338	61.0826	60.9125
PI594082	7505.93	4354.29	3.8105	55.3797	55.1773
Ames27065	7506.74	4710.12	3.98138	56.1497	55.9374
NSL30883	7508.36	5265.54	4.72012	62.8184	62.6124
PI509542	7509.98	4993.78	4.9242	64.2595	64.0497
PI648432	7513.49	5096.24	4.36345	60.2763	60.0636
PI601684	7514.3	5548.54	4.70364	62.8229	62.6221
Ames22794	7517.36	5220.3	4.76932	64.4651	64.3314
NSL30895	7520.78	5053.68	4.77153	63.2234	63.0043
PI550556	7525.73	5335.82	4.50714	61.3961	61.2401
Ames26791	7526.34	4927.61	3.78484	54.8366	54.6718
PI200195	7528.96	4739.68	3.16765	50.5377	50.3222
Ames22441	7529.52	5096.36	4.58721	62.5482	62.4337
PI648427	7529.56	4869.66	4.23696	59.6769	59.4644
Ames26753	7530.56	5363.17	4.54929	62.2564	62.0309
Ames26785	7531.78	5587.96	5.2147	67.0941	66.903
Ames23499	7532.23	5529.06	3.20259	52.35	52.2049
PI550465	7532.29	4933.59	4.20159	58.9003	58.7118
PI593008	7533.11	5220.62	3.88656	58.452	58.2393
PI561526	7535.95	4924.74	3.18208	50.377	50.1436
Ames23466	7536.12	5377.25	5.05562	67.0825	66.8766
PI594058	7538.35	5200.54	4.47985	61.6685	61.4439
Ames26763	7539.57	4798.79	4.5777	62.0491	61.8156
Ames26787	7539.7	5354.06	5.23026	68.9002	68.6387
PI601491	7539.77	5776.34	5.10342	67.7742	67.5855
PI594078	7540.24	5212.89	4.97621	66.7942	66.5622
PI601501	7541.48	4767.83	4.18099	59.0829	58.8885
PI648426	7541.6	5016.39	4.12846	59.1323	58.9151
Ames23503	7542.41	4984.51	4.00223	56.9256	56.7013
Ames26801	7542.75	4807.83	4.21206	60.3177	60.1197
PI601683	7544.4	4933.61	4.13695	59.7991	59.6419
PI601229	7545.05	5255.78	3.48419	53.3821	53.1704
PI594063	7545.27	4463.26	3.24076	51.1268	50.9667
Ames27019	7547.78	5149.65	3.60771	54.3336	54.1869
Ames26808	7548.43	4814.52	3.73623	55.4831	55.2718
Ames23483	7549.27	4646.05	3.57069	54.6497	54.4966
NSL437913	7552.58	5166.78	5.04454	67.5126	67.3075
Ames23485	7553.19	5394.25	3.19406	51.628	51.46
PI546485	7553.63	5404.54	4.71206	64.05	63.8863
NSL81600	7554.43	5493.51	4.75361	65.7429	65.4889
Ames23491	7557.66	5037.23	3.75816	57.7639	57.6012
PI594047	7558.26	4994.78	4.03166	58.8154	58.6188
Ames28419	7559.08	5149.08	3.78694	57.7083	57.5048
NSL437871	7559.36	4612.44	3.2344	51.92	51.6952
PI538009	7560.89	5005.14	4.72671	64.6689	64.4649
Ames30971	7564.92	4906.91	3.9096	58.3791	58.1784
PI550571	7564.98	5340.92	2.87614	48.9934	48.8315
Ames27217	7567.09	5477.35	4.03025	58.0215	57.8337
PI558523	7569.25	4911.15	3.01598	50.1227	49.8701
Ames26769	7571.42	4494.93	3.52863	53.9233	53.7585
PI600957	7571.72	4825.75	3.37639	52.8509	52.6548
NSL30876	7573.01	4586.9	3.61996	54.9673	54.7408
Ames24590	7573.25	5281.96	4.78075	66.8529	66.5818
Ames27056	7573.82	4512.25	3.02163	49.7774	49.6826
Ames24745	7573.89	5281.22	4.76632	65.7508	65.5176
PI601468	7574.91	5024.15	4.2788	61.8459	61.6167
PI200192	7575.52	5284.79	4.02206	59.3422	59.1408
PI506257	7576.69	5215.79	4.04169	60.3806	60.1728
Ames30799	7577.39	4942.82	3.37333	52.1213	51.9662
Ames27156	7578.19	4947.87	3.79605	57.7862	57.5347
Ames30959	7578.2	5125.47	2.07296	38.4572	38.2809
Ames2337	7580.13	5309.77	2.41989	45.109	44.8669
PI607523	7580.33	4751.83	4.02325	59.7324	59.4782
Ames22752	7583.47	5480.2	4.47476	65.0422	64.837
Ames12728	7584.98	4646.25	3.48958	56.2875	56.0498
NSL22634	7585.37	5313.86	4.42247	64.2441	64.0241
NSL30064	7586.3	4910.04	4.11482	62.2524	62.0032
PI601209	7590.98	5193.31	4.06202	61.5281	61.3088
Ames27181	7591.76	5028.52	3.80235	58.1409	57.8844
Ames26127	7592.14	5136.33	3.54438	55.2969	55.0369
Ames29451	7594.37	4320.53	2.20153	42.8587	42.7592
PI594086	7597.04	4628.46	3.55218	56.8008	56.6097
Ames26744	7597.16	5109.79	3.90598	59.5757	59.3128
Ames12819	7597.5	4246	3.13918	53.4331	53.2051
PI565100	7598.42	4920.35	4.26488	63.5349	63.3495
Ames31252	7598.56	4528.66	2.80404	47.1597	46.9538
Ames10254	7599.39	5369.2	4.48673	65.1578	64.9165
Ames27201	7600.73	5278.27	3.85031	59.3635	59.1475
PI303926	7602.93	4717.31	3.83473	58.9912	58.7608
NSL242484	7604.23	4797.61	3.51207	56.1081	55.9135
PI601378	7607.82	5045.55	3.54723	57.4769	57.2356
NSL30067	7608.91	5147.35	4.27779	63.42	63.1613
PI658079	7609.15	4815.3	3.84156	58.4885	58.2861
PI587146	7610.35	5446.56	5.05852	71.4005	71.1582
NSL437925	7619.03	5081.69	3.65152	58.4827	58.2142
Ames10249	7619.73	4489.73	2.84388	50.7122	50.4886
PI520774	7625.58	4743.15	3.68718	59.1996	58.9714
PI539925	7626.49	5442.17	3.99227	61.5619	61.3779
NSL42872	7628.24	5849.56	4.29372	65.6638	65.4557
Ames27042	7630.28	4871.73	3.64468	58.5583	58.3935
PI601792	7632.09	5067.36	4.12728	64.8981	64.6558
Ames23488	7632.73	5485.12	3.81543	62.0449	61.8359
NSL30913	7633.67	4707.11	3.41201	58.3211	58.0867
PI391680	7639.24	4959.46	3.80778	60.4692	60.2062
Ames21512	7641.51	5117.38	3.82149	61.258	60.9755
PI639055	7641.52	4944.35	3.32309	56.5996	56.3881
PI608768	7642.37	5446.52	3.5445	57.811	57.548
NSL30871	7642.84	4681.95	3.19213	54.4648	54.1816
PI559950	7644.11	4526.21	3.71889	59.5026	59.3196
Ames26125	7645.45	5015.54	3.88433	62.1187	61.8642
PI592734	7646.11	5477.27	4.29167	65.5394	65.2618
Ames23435	7647.54	4860.2	3.87587	62.5051	62.2283
Ames23496	7648.09	5302.72	3.79617	60.5224	60.2428
PI601685	7651.31	5901.41	3.52791	57.5244	57.2665
Ames12814	7651.56	4955.26	3.33456	55.6235	55.3724
Ames12732	7653.08	5456.03	3.11959	54.1981	53.9509
Ames27114	7654.31	4978.73	3.53091	58.7769	58.5332
PI550471	7654.86	5492	3.19308	55.7318	55.4396
Ames25179	7655.8	5585.97	3.7314	62.3123	62.0514
Ames31245	7655.96	4922.96	2.8009	49.2828	49.0821
NSL30877	7657.83	5090.83	2.93862	53.0045	52.7246
PI596357	7660.17	5281.15	3.28306	56.9265	56.676
PI607525	7660.86	4934.22	3.46392	59.133	58.8743
PI391676	7664.92	4774.37	2.89539	52.6875	52.3991
PI561527	7665.76	4337.98	3.47452	59.2979	59.0444
PI601319	7669.35	4863.26	3.72829	62.0853	61.8053
Ames23408	7669.65	4798.01	2.97398	54.4561	54.2512
Ames23437	7670.32	5236.84	3.72244	61.5833	61.386
Ames27191	7672.34	4728.83	2.2487	45.6368	45.4558
Ames19310	7675.93	5463.49	3.43092	59.8641	59.6652
PI535914	7679.34	4839.29	2.6058	50.5786	50.3652
PI550542	7680.02	5035.09	3.75898	62.931	62.6985
PI506256	7680.09	5098.02	3.30398	57.6539	57.3812
CIze40	7681.36	5369.75	4.25001	68.0816	67.7942
PI587142	7682.18	4856.49	3.19284	56.5266	56.2539
Ames27145	7682.98	5128.08	3.33134	59.0689	58.7996
Ames12820	7686.75	4062.28	2.86068	52.6764	52.4059
Ames27160	7689.76	4535.53	2.7099	51.9315	51.6357
PI601788	7696.04	5217.83	3.45725	60.5172	60.2092
NSL28967	7696.15	5087.79	3.84181	65.3785	65.127
PI560074	7697.96	5103.77	3.05662	56.8178	56.5225
NSL30902	7700.96	5128.57	3.85029	65.7922	65.4863
PI648428	7702.76	5322.76	3.60668	62.1734	61.8933
Ames24720	7703.9	5154.62	3.67289	65.4825	65.1865
PI547090	7705.93	4673.3	3.39947	61.3751	61.115
PI597578	7707.53	5155.89	1.79786	43.0088	42.7213
NSL42874	7707.7	4936.24	3.56947	62.9607	62.7139
Ames27215	7708.41	5409.74	3.17513	58.3622	58.1686
PI538010	7711.94	5513.2	3.66015	63.7472	63.4791
PI553064	7712.55	5833.6	4.06295	68.0426	67.7593
PI633840	7713.68	5296.36	3.24989	59.7774	59.4693
Ames27116	7714.56	5404.23	2.62716	51.1214	50.9196
PI594055	7715.19	4439.44	2.31875	49.2607	48.9577
PI594091	7716.16	4482.1	2.75652	52.3861	52.1487
PI531511	7716.3	4443.85	2.73744	53.3357	53.0764
NSL65866	7719.7	5481.22	3.2178	60.0464	59.7294
Ames26804	7719.84	4084.58	2.47907	51.1068	50.8051
Ames27105	7721.1	5097.41	3.43698	62.0347	61.8161
PI594084	7723.67	4651.14	2.77367	55.4935	55.1825
PI550461	7725.47	5559.66	3.06412	57.9389	57.6547
PI601441	7728.19	5504.08	3.47909	63.4473	63.1134
Ames27209	7728.37	4910.64	2.66211	50.2102	50.0368
PI550473	7730.24	5355.18	3.11929	59.1914	58.881
Ames22097	7731.54	5180.55	3.57934	63.2162	62.9731
PI651531	7731.65	5308.31	1.84451	43.407	43.1654
PI601729	7731.89	5303.29	3.40832	62.6499	62.3254
PI561537	7731.92	4976	2.48378	53.5244	53.2605
PI555660	7732.75	4678.99	3.0997	59.9399	59.6598
PI608767	7733.69	4995.57	3.62759	64.5677	64.2854
Ames22793	7737.19	5338.23	3.77088	67.7212	67.452
PI561517	7738.48	4527.63	2.01615	46.576	46.3066
PI267170	7739.93	5155.89	3.22996	62.86	62.6063
PI539922	7743.66	5395.72	2.94872	57.3293	57.0371
PI601502	7748.06	5630.12	3.62249	66.1676	65.8229
PI601492	7749.22	5818.07	3.69741	67.2007	66.8684
PI651543	7750.56	5246.32	2.63426	53.756	53.4967
Ames24714	7751.44	5093.93	2.89321	57.6442	57.3856
Ames26773	7752.89	5656.74	3.26532	61.6814	61.3403
Ames8397	7752.99	5450.42	3.28626	60.934	60.6032
Ames24750	7753.34	4947.93	3.81556	67.8806	67.543
CIze42	7756.17	5596.83	3.03913	59.8736	59.5944
PI595366	7757.11	5844.84	3.2435	62.8982	62.5549
PI537098	7757.15	5433.36	3.41787	64.7907	64.4891
NSL32727	7759.37	5582.56	2.10939	49.3465	49.0275
NSL30864	7762.32	4937.45	2.85382	57.7149	57.3825
PI561533	7771.66	4079.02	2.41083	52.1029	51.7772
Ames28421	7773.48	5288.91	2.87464	58.4569	58.1954
PI542953	7774.7	4584.51	2.01005	48.9231	48.6436
PI568160	7774.7	5359.32	2.85239	58.5316	58.2321
PI601559	7779.14	5254.51	3.09686	62.2088	61.8637
NSL65864	7788.65	5556.38	2.32539	53.375	53.1495
PI597925	7794.47	5483.96	2.5742	55.1358	54.8059
PI542950	7794.51	5161.31	2.28421	51.5634	51.2897
Ames23504	7796.19	5132.61	3.20109	63.3993	63.044
Ames25270	7800.83	5353.03	2.72315	57.8574	57.569
Ames27205	7803.86	5524.33	2.69588	59.2763	58.9694
NSL32736	7804.72	4839.02	2.46363	57.1296	56.7815
Ames26121	7805.35	4853.72	2.49689	57.2709	56.9668
Ames28423	7806.18	5233.21	2.80479	60.5195	60.2009
PI601779	7807	4877.76	2.52963	57.9877	57.6833
Ames22757	7807.08	5248.96	3.39151	68.1062	67.8022
Ames26802	7818.69	5606.64	3.38893	68.6698	68.288
PI601610	7826.75	5789.36	3.53685	70.5181	70.1323
Ames27161	7826.95	5079.67	2.70392	59.1042	58.7454
PI594083	7835.11	4784.12	2.1906	54.105	53.8061
PI639932	7835.45	4813.33	1.25723	40.104	39.9171
Ames26792	7838.29	5610.41	1.97305	52.1934	51.8433
PI550573	7843.32	4604.13	2.52655	58.4172	58.1365
Ames23475	7845.5	4987.03	2.34769	58.0504	57.691
Ames26748	7848.05	5407.18	2.42679	57.856	57.4935
PI591014	7848.65	5428.05	2.14537	53.4899	53.1976
Ames30791	7850.72	5662.06	2.62942	63.0038	62.672
PI564682	7866.83	5550.6	2.2628	57.6329	57.2641
PI641229	7867.26	5488.62	2.59473	61.5238	61.1816
PI511309	7867.66	5574.7	2.49515	61.0694	60.7088
Ames27159	7874.43	5409.11	2.44932	60.1979	59.8163
PI560075	7874.92	5408.35	1.96542	53.2041	52.9052
Ames26443	7878.62	5052.22	1.75279	48.9288	48.6529
PI601170	7878.93	5712.79	2.81446	66.0479	65.6494
PI221797	7887.42	5145.39	2.4518	59.806	59.4671
NSL29319	7895.66	4803.13	1.79718	52.3882	52.0156
Ames27202	7895.77	5134.56	1.46845	46.6172	50.9831
Ames31244	7897.16	5355.39	1.63628	49.7491	49.4627
NSL32723	7897.84	5706.74	2.24449	58.811	58.5528
PI651541	7907.96	4734.73	2.05883	57.519	57.2071
Ames30960	7920.7	5292.32	1.41292	46.8618	46.5749
Ames27049	7932.7	5412.03	1.82014	54.5491	54.3078
PI601171	7933.15	5570.02	2.35087	63.284	62.8857
PI538237	7938.9	5025.5	0.987941	39.2174	39.087
CIze44	7942.06	5150.36	2.16035	60.8545	60.4581
NSL174429	7943.02	5446.01	1.45266	50.2932	49.9565
PI600954	7943.76	5376.01	2.25023	63.4259	63.0136
Ames28951	7947.6	5720.23	2.05136	60.9378	60.5663
CIze21	7949.96	5000.67	1.6031	54.1375	53.7928
Ames23426	7950.82	5401.66	1.55876	52.9116	52.6251
Ames27151	7968.7	4891.93	1.17036	47.0112	46.6507
PI511311	7973.43	5449.59	1.58437	54.8867	54.5195
Ames26123	7976.94	4884.46	1.85209	59.4238	59.0044
PI391660	7980.18	5205.6	2.00388	61.4808	61.0868
PI594071	7982.4	5793.2	2.03858	62.2228	61.7993
CIze28	7983.6	5393.16	1.98541	63.8206	63.4203
PI511313	7984.56	5412.03	1.79655	59.5698	59.1598
Ames30946	7988.21	5457.09	1.16582	42.4088	42.2359
PI548801	7988.68	5008.85	1.87125	59.9979	59.7028
NSL30065	8002.2	5457.08	1.60293	59.0379	58.6973
Ames26122	8003.52	5100	1.78739	61.4987	61.1079
PI539924	8009.45	5730	1.86326	62.7152	62.3562
Ames27194	8013.49	5518.06	2.0736	66.3001	65.9192
Ames23482	8017.24	5277.5	1.74308	61.24	60.9101
PI538238	8017.54	5582.25	0.348178	36.5354	36.2709
PI524969	8029.54	5536.89	1.777	63.7675	63.3909
Ames30961	8045.96	5659.01	0.71304	43.9169	43.6161
NSL437905	8047.63	5517.59	0.627345	40.7635	40.5332
Ames26797	8064.53	5351.67	1.25583	56.288	55.9065
PI511310	8066	6050.37	1.32482	59.2292	58.8356
PI639052	8068.05	5435.35	0.749911	37.8231	37.5699
PI587141	8078.15	5196.61	1.06909	53.3701	53.1066
Ames10255	8094.86	6073.17	0.763534	50.6553	50.3738
PI601775	8095.45	6049.41	1.47796	64.9793	64.5106
PI406114	8113.72	5256.34	0.989934	58.1353	57.7518
PI558528	8144.46	5820.8	1.0918	62.868	62.4503
PI651540	8155.17	4949.88	0.632803	50.3647	50.0189
PI601405	8199.31	4884.87	0.530007	54.8374	54.4596
Ames27190	8272.31	5480.06	0.0273233	49.1108	48.7192
Ames30949	8318.69	5752.4	-0.0393787	49.756	49.5268
PI634206	8345.7	4685.45	-0.46861	44.2769	43.8794
PI610494	8504.57	4575.75	-0.781233	38.9339	38.6996
PI610493	8633.17	5345.08	-1.43077	43.5402	43.1808
Ames2332	8664.22	6118.62	-1.77938	48.1138	47.6461
NSL32728	NA	4218.89	NA	57.1023	57.831
